# Supplementary material for: Air pollution disparities and equality assessments of US national decarbonization strategies
Source: PubMed Central journal article supplement (PMC9722701; doi:10.1038/s41467-022-35098-4), 2022-12-05
Supplement: 41467_2022_35098_MOESM1_ESM.pdf [file 41467_2022_35098_MOESM1_ESM.pdf]

# Air pollution disparities and equality assessments of US national decarbonization strategies

## Supplemental Information (SI)

Teagan Goforth<sup>1,\*</sup> and Destenie Nock<sup>1,2,\*</sup>

1. Engineering and Public Policy, Carnegie Mellon University, USA
2. Civil and Environmental Engineering, Carnegie Mellon University, USA

## Contents

|                                            |    |
|--------------------------------------------|----|
| A. Model description .....                 | 2  |
| B. Emission Rates.....                     | 4  |
| C. InMAP specifications.....               | 5  |
| D. Generation.....                         | 8  |
| E. National Emissions .....                | 10 |
| F. Regional Air Pollution Analysis .....   | 15 |
| G. Air Pollution Equality Assessments..... | 17 |

## A. Model description

Figure S-1 presents the regions from Regional Energy Deployment System (ReEDS) that are used in the subnational analysis.

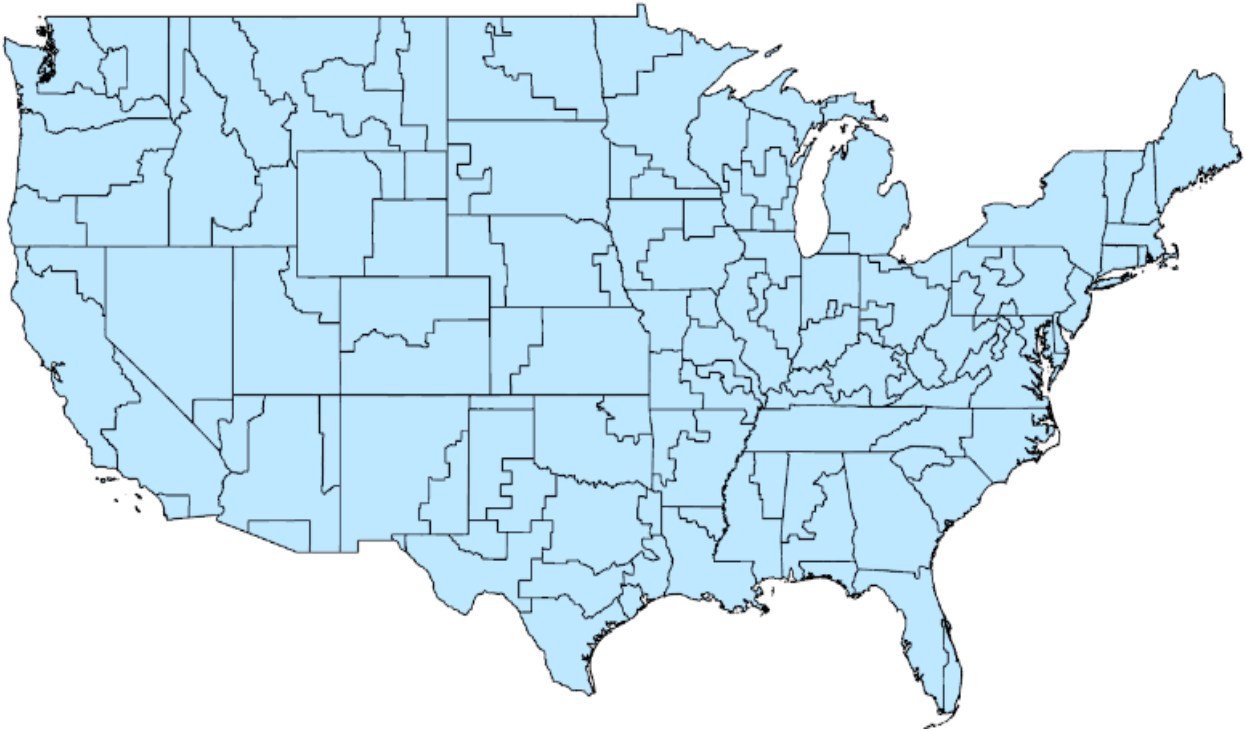

**Figure S-1:** ReEDS regions used in model evaluation (shapefile sourced from NREL ReEDS)<sup>1</sup>.

Other than carbon policy implementations, no changes were made to the ReEDS' 'Mid\_Case' inputs defined in the model inputs. The ReEDS' 'Mid\_Case' uses the middle price assumptions for technologies. Relevant ReEDS 'Mid\_Case' inputs and assumptions include: sequential solve (solve one year before continuing to the next), price assumptions for all technologies are from the US Energy Information Administration (EIA) 's Annual Energy Outlook (AEO) reference and mid-case, and current policy assumptions (AB32, CSAPR, wind Production Tax Credit (PTC), RGGI, state RPS). These cost, policy, and solve assumptions stay the same throughout all the scenarios. See the ReEDS documentation for a more thorough explanation of assumptions and inputs<sup>1</sup>.

Table S-1 describes the carbon cap, national RPS, and low carbon technology mandates as input into ReEDS for each corresponding scenario.

**Table S-1:** Description of carbon cap (Mt CO<sub>2</sub>/year), renewable portfolio standards (percent renewable energy generation per year), and low carbon technology mandates (percent low carbon technology generation per year) for each scenario.

| Year | No carbon policies | Carbon cap (Mt CO <sub>2</sub> /year) |       | Renewable energy generation mandate (%) |     |    | Low carbon generation mandate (%) |    |
|------|--------------------|---------------------------------------|-------|-----------------------------------------|-----|----|-----------------------------------|----|
|      | A                  | B                                     | C     | D                                       | E   | F  | G                                 | H  |
| 2010 | -                  | 4,808                                 | 4,808 | 0                                       | 0   | 0  | 0                                 | 0  |
| 2011 | -                  | 4,808                                 | 4,808 | 0                                       | 0   | 0  | 0                                 | 0  |
| 2012 | -                  | 4,808                                 | 4,808 | 0                                       | 0   | 0  | 0                                 | 0  |
| 2013 | -                  | 4,808                                 | 4,808 | 0                                       | 0   | 0  | 0                                 | 0  |
| 2014 | -                  | 4,808                                 | 4,808 | 0                                       | 0   | 0  | 0                                 | 0  |
| 2015 | -                  | 4,808                                 | 4,808 | 0                                       | 0   | 0  | 0                                 | 0  |
| 2016 | -                  | 4,808                                 | 4,808 | 0                                       | 0   | 0  | 0                                 | 0  |
| 2017 | -                  | 4,808                                 | 4,808 | 0                                       | 0   | 0  | 0                                 | 0  |
| 2018 | -                  | 4,808                                 | 4,808 | 0                                       | 0   | 0  | 0                                 | 0  |
| 2019 | -                  | 4,808                                 | 4,808 | 0                                       | 0   | 0  | 0                                 | 0  |
| 2020 | -                  | 1,341                                 | 1,341 | 20                                      | 20  | 20 | 20                                | 20 |
| 2021 | -                  | 1,427                                 | 1,405 | 22                                      | 25  | 23 | 25                                | 23 |
| 2022 | -                  | 1,329                                 | 1,258 | 24                                      | 31  | 25 | 31                                | 25 |
| 2023 | -                  | 1,221                                 | 1,168 | 26                                      | 36  | 28 | 36                                | 28 |
| 2024 | -                  | 1,116                                 | 1,092 | 28                                      | 41  | 31 | 41                                | 31 |
| 2025 | -                  | 1,002                                 | 979   | 30                                      | 47  | 33 | 47                                | 33 |
| 2026 | -                  | 973                                   | 889   | 32                                      | 52  | 36 | 52                                | 36 |
| 2027 | -                  | 951                                   | 775   | 34                                      | 57  | 39 | 57                                | 39 |
| 2028 | -                  | 928                                   | 649   | 36                                      | 63  | 41 | 63                                | 41 |
| 2029 | -                  | 896                                   | 524   | 38                                      | 68  | 44 | 68                                | 44 |
| 2030 | -                  | 844                                   | 464   | 40                                      | 73  | 47 | 73                                | 47 |
| 2031 | -                  | 802                                   | 402   | 42                                      | 79  | 49 | 79                                | 49 |
| 2032 | -                  | 766                                   | 323   | 44                                      | 84  | 52 | 84                                | 52 |
| 2033 | -                  | 734                                   | 245   | 46                                      | 89  | 55 | 89                                | 55 |
| 2034 | -                  | 700                                   | 178   | 48                                      | 95  | 57 | 95                                | 57 |
| 2035 | -                  | 668                                   | 167   | 50                                      | 100 | 60 | 100                               | 60 |
| 2036 | -                  | 637                                   | 160   | 52                                      | 100 | 63 | 100                               | 63 |
| 2037 | -                  | 610                                   | 154   | 54                                      | 100 | 65 | 100                               | 65 |
| 2038 | -                  | 586                                   | 146   | 56                                      | 100 | 68 | 100                               | 68 |
| 2039 | -                  | 575                                   | 137   | 58                                      | 100 | 71 | 100                               | 71 |
| 2040 | -                  | 582                                   | 126   | 60                                      | 100 | 73 | 100                               | 73 |
| 2041 | -                  | 589                                   | 114   | 62                                      | 100 | 76 | 100                               | 76 |
| 2042 | -                  | 594                                   | 103   | 64                                      | 100 | 79 | 100                               | 79 |
| 2043 | -                  | 601                                   | 92    | 66                                      | 100 | 81 | 100                               | 81 |

|      |   |     |    |    |     |     |     |     |
|------|---|-----|----|----|-----|-----|-----|-----|
| 2044 | - | 608 | 80 | 68 | 100 | 84  | 100 | 84  |
| 2045 | - | 613 | 69 | 70 | 100 | 87  | 100 | 87  |
| 2046 | - | 619 | 57 | 72 | 100 | 89  | 100 | 89  |
| 2047 | - | 624 | 46 | 74 | 100 | 92  | 100 | 92  |
| 2048 | - | 629 | 34 | 76 | 100 | 95  | 100 | 95  |
| 2049 | - | 634 | 23 | 78 | 100 | 97  | 100 | 97  |
| 2050 | - | 639 | 11 | 80 | 100 | 100 | 100 | 100 |

## B. Emission Rates

The emissions rate sources for each technology type included in the environmental sustainability analysis are shown in Table S-2.

**Table S-2:** Emission rates sources.

|                                     | Operating Emission Rates |                 |                 |                   |
|-------------------------------------|--------------------------|-----------------|-----------------|-------------------|
|                                     | CO <sub>2</sub> eq.      | NO <sub>x</sub> | SO <sub>2</sub> | PM <sub>2.5</sub> |
| Biopower                            | 1                        | 1               | 1               |                   |
| Solar photovoltaic                  | 1                        | 1               | 1               | -                 |
| Concentrated solar power (CSP)      | 1                        | 1               | 1               | -                 |
| Onshore wind                        | 1                        | 1               | 1               | -                 |
| Offshore wind                       | 1                        | 1               | 1               | -                 |
| Nuclear                             | 1                        | 1               | 1               | -                 |
| Natural gas combustion turbine (CT) | 1                        | 1               | 1               | 2                 |
| Natural gas combined cycle (CC)     | 1                        | 1               | 1               | 2                 |
| Natural gas CCS                     | 1                        | 1               | 1               | 2                 |
| Hydropower                          | 1                        | 1               | 1               | -                 |
| Geothermal                          | 1                        | 1               | 1               |                   |
| Oil-Gas-Steam                       | 1                        | 1               | 1               | 2                 |
| Coal                                | 1                        | 1               | 1               | 2                 |
| IGCC                                | 1                        | 1               | 1               | 2                 |
| Coal CCS                            | 1                        | 1               | 1               | 2                 |
| Battery storage                     | 1                        | 1               | 1               | -                 |
| Pumped hydropower                   | 1                        | 1               | 1               | -                 |

Table S-3 presents the heat rates for each fossil fuel plant used to estimate the emissions rate. Since most renewable technologies do not convert fuel to electricity, they do not have a heat rate (excluding biopower). We also assume renewable energy besides biopower does not emit anything in operation.

**Table S-3:** Heat rates for power plants in MMBtu/MWh and fuel rates in pounds (lb)/MMBtu.<sup>1</sup>

| Technology        | CO <sub>2</sub> fuel rate<br>[lb/MMBtu] | NO <sub>x</sub> fuel rate<br>[lb/MMBtu] | SO <sub>2</sub> fuel rate<br>[lb/MMBtu] | PM <sub>2.5</sub> fuel rate<br>[lb/MMBtu] | Heat rate<br>[MMBtu/MWh] |
|-------------------|-----------------------------------------|-----------------------------------------|-----------------------------------------|-------------------------------------------|--------------------------|
| Coal              | 211                                     | 0.153                                   | 0.470                                   | 0.016                                     | 9.669                    |
| Cofire            | 179                                     | 0.130                                   | 0.411                                   | 0.029                                     | 10.112                   |
| Coal CCS          | 21.1                                    | 0.085                                   | 0.056                                   | 0.016                                     | 10.157                   |
| Coal IGCC         | 211                                     | 0.085                                   | 0.056                                   | 0.016                                     | 7.920                    |
| Gas CC            | 117                                     | 0.02                                    | 0.005                                   | 0.007                                     | 6.341                    |
| Gas CCS           | 11.7                                    | 0.02                                    | 0.005                                   | 0.007                                     | 7.505                    |
| Gas CT            | 117                                     | 0.15                                    | 0.015                                   | 0.007                                     | 9.36                     |
| Oil-Gas-<br>Steam | 137                                     | 0.172                                   | 0.299                                   | 0.116                                     | 10.648                   |
| Biopower          | 0                                       | 0                                       | 0.08                                    | 0.101                                     | 13.5                     |
| Nuclear           | 0                                       | 0                                       | 0                                       | -                                         | 10.461                   |

### C. InMAP specifications

The Intervention Model for Air Pollution (InMAP) intakes emissions at the ReEDS level and area weights them across the ReEDS region to fit InMAP defined regions (1x1 km to 48x48 km squares). InMAP uses these emissions input to estimate the average annual concentration. While running, InMAP uses a reaction-advection-diffusion equation that estimates where air pollution ends up as ambient concentrations. The model uses a steady state formulation for each time step and continues to run until the air pollution concentrations reach steady state (the change in concentration is zero). Within each time step, each region accounts for the flux of new emissions and how pollution concentrations are affected by physical and chemical processes. Once the model reaches steady state, it outputs a shapefile with the annual average ambient concentrations for each region.<sup>3</sup>

InMAP uses area-weighting to distribute emissions at the ReEDS level (134 regions) to the InMAP level (squares with 1 to 48 km sides). Equations S-1a and S-1b display the two-step process for area-weighting<sup>4</sup>. In Equation S-1a, the areal weight for each InMAP region is calculated, where  $W_{I,i}$  is the areal weight for the InMAP region  $i$  (in km<sup>2</sup>),  $A_{I,i}$  is the area of the InMAP region (in km<sup>2</sup>), and  $A_{R,j}$  is the area of the ReEDS region  $j$ . Equation S-1b calculates the areal weighted air pollution value in each InMAP region, where  $E_{I,i}$  is the estimated air pollution

magnitude in each InMAP region and  $Q_{R,j}$  is the PM, NO<sub>x</sub>, or SO<sub>2</sub> air pollution (in kilograms) in each ReEDS region j.

$$W_{I,i} = \frac{A_{I,i}}{A_{R,j}} \quad (\text{S-1a})$$

$$E_{I,i} = W_{I,i} * Q_{R,j} \quad (\text{S-1b})$$

InMAP requires emissions inputs in shapefile form at the ReEDS region to perform this area weighting. Figure S-2(a-c) below shows the NO<sub>x</sub>, SO<sub>2</sub>, and PM emissions inputs, respectively (in metric tonnes) for InMAP, which show the total emissions in each region in 2020, 2035, and 2050.

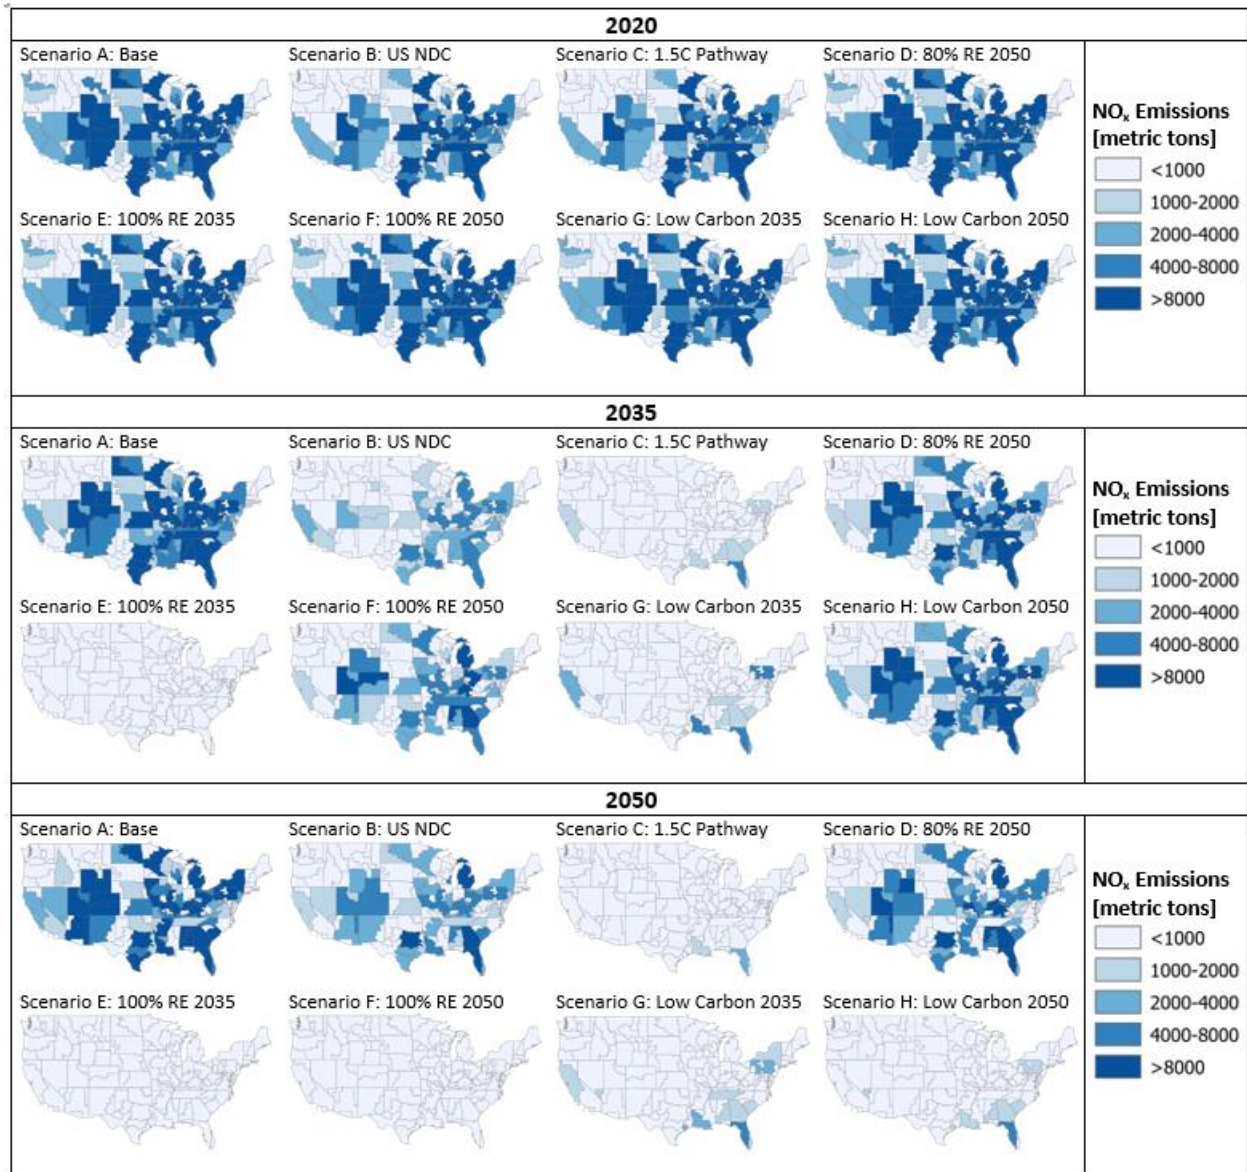

(a) NO<sub>x</sub>

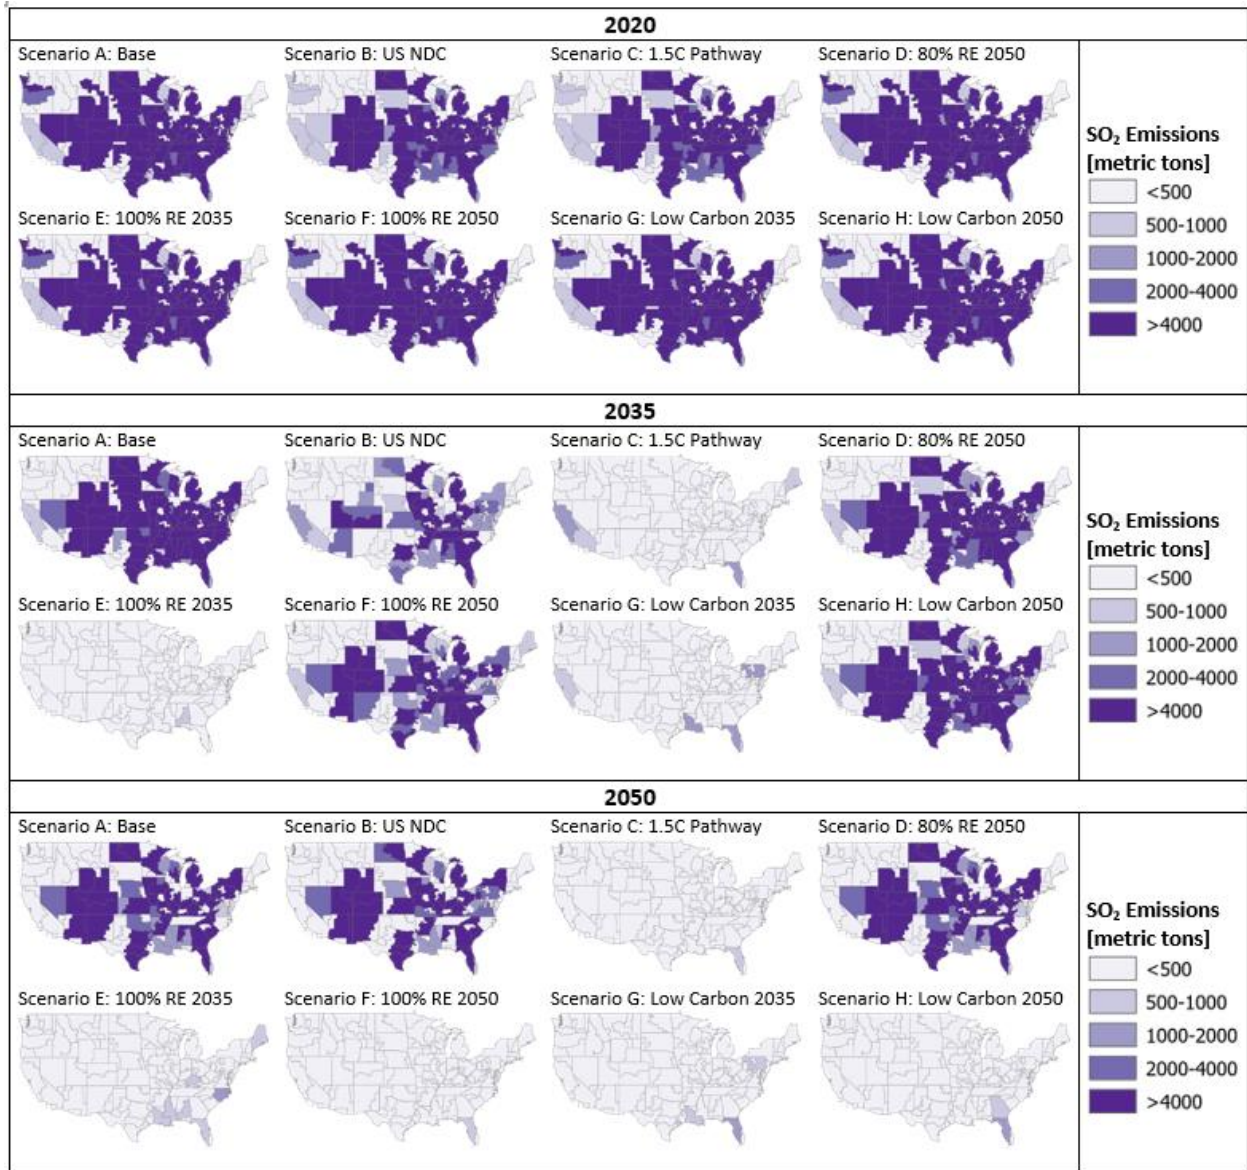

(b) SO<sub>2</sub>



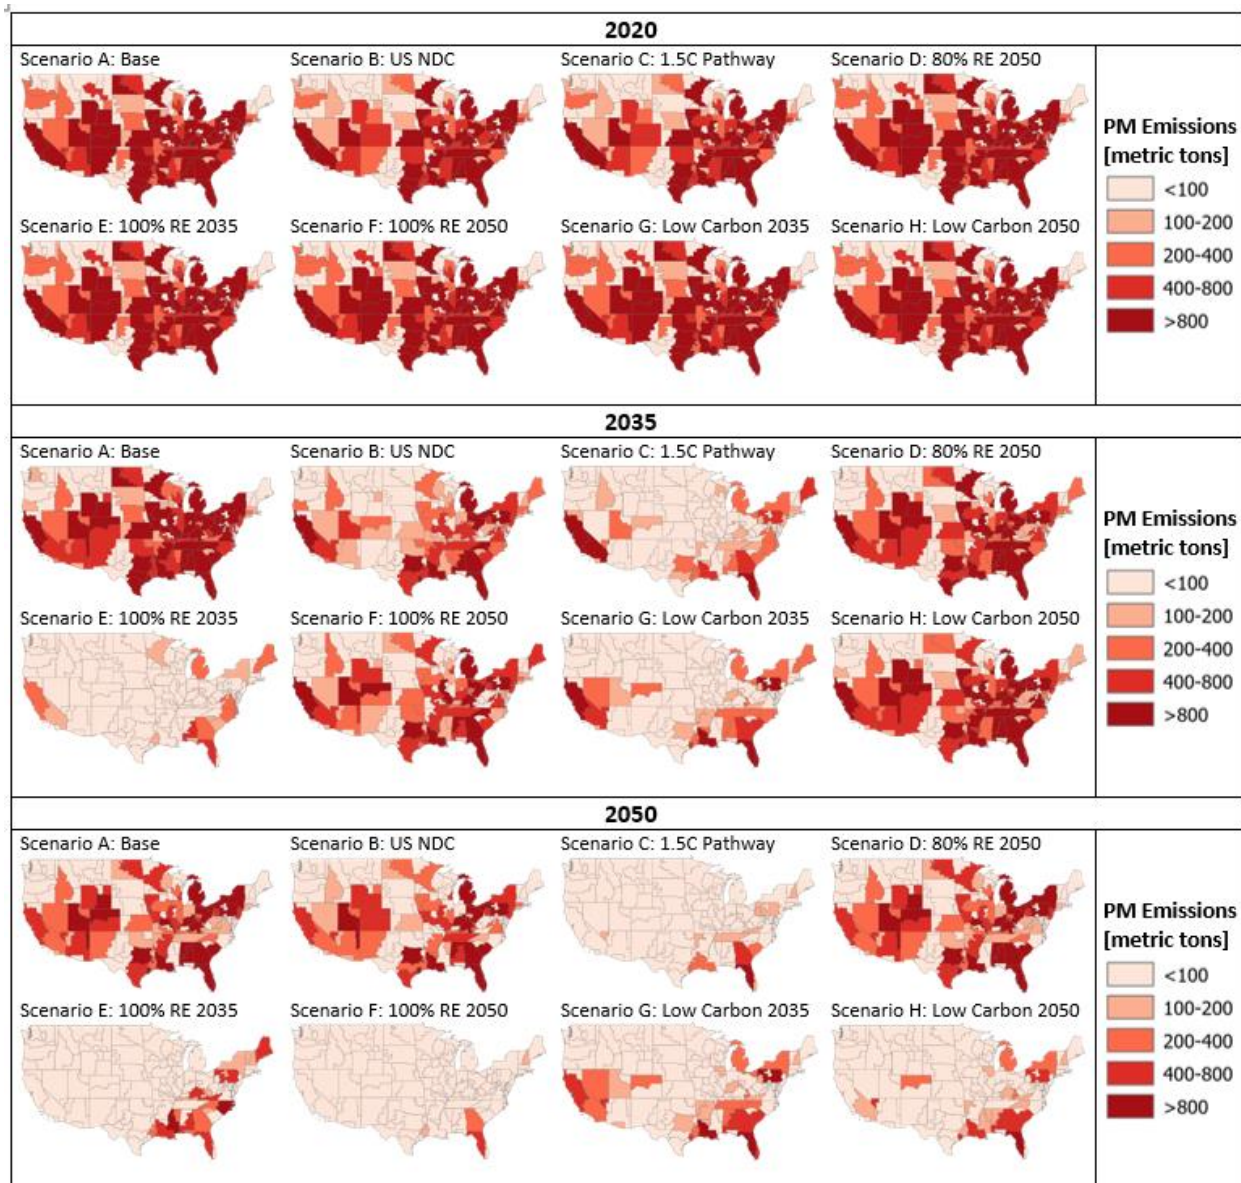

(c) PM<sub>2.5</sub>

**Figure S-2:** Total (a) NO<sub>x</sub> (b) SO<sub>2</sub> and (c) PM<sub>2.5</sub> emissions in each ReEDS region 2020, 2035, and 2050 for each scenario.

## D. Generation

Table S-4 summarizes the percent of annual generation and the magnitude of generation for the main technologies across scenarios and by decade.

**Table S-4:** Summary of percent and magnitude of generation from main technologies by year and scenario.



|                 |                 | 2010 |      | 2020 |      | 2030  |      | 2040 |      | 2050 |      |
|-----------------|-----------------|------|------|------|------|-------|------|------|------|------|------|
|                 | Technology      | %    | PWh  | %    | PWh  | %     | PWh  | %    | PWh  | %    | PWh  |
| A: Base         | Coal            | 50.6 | 2.05 | 26.3 | 1.10 | 23.9  | 1.07 | 18.6 | 0.91 | 7.46 | 0.41 |
|                 | Natural Gas     | 18.7 | 0.76 | 35.1 | 1.46 | 32.6  | 1.46 | 26.5 | 1.29 | 19.9 | 1.08 |
|                 | Natural Gas CCS | 0.0  | 0.00 | 0.0  | 0.00 | 0.0   | 0.00 | 0.0  | 0.00 | 0.0  | 0.00 |
|                 | Nuclear         | 19.7 | 0.80 | 17.7 | 0.74 | 15.1  | 0.68 | 12.0 | 0.58 | 6.9  | 0.37 |
|                 | Solar PV        | 0.1  | 0.00 | 3.6  | 0.15 | 7.9   | 0.35 | 14.1 | 0.69 | 20.9 | 1.14 |
|                 | CSP             | 0.0  | 0.00 | 0.06 | 0.0  | 0.24  | 0.01 | 0.52 | 0.03 | 0.48 | 0.03 |
|                 | Onshore Wind    | 2.6  | 0.11 | 8.4  | 0.35 | 10.6  | 0.48 | 19.1 | 0.93 | 33.8 | 1.83 |
|                 | Offshore Wind   | 0.0  | 0.00 | 0.0  | 0.00 | 1.3   | 0.06 | 1.6  | 0.08 | 3.1  | 0.17 |
| B: US NDC       | Coal            | 50.6 | 2.05 | 16.2 | 0.67 | 5.5   | 0.25 | 1.7  | 0.08 | 4.7  | 0.25 |
|                 | Natural Gas     | 18.7 | 0.76 | 40.3 | 1.68 | 35.2  | 1.58 | 27.5 | 1.35 | 19.7 | 1.07 |
|                 | Natural Gas CCS | 0.0  | 0.00 | 0.0  | 0.00 | 0.0   | 0.00 | 0.0  | 0.00 | 0.0  | 0.00 |
|                 | Nuclear         | 19.7 | 0.80 | 17.7 | 0.74 | 15.0  | 0.68 | 11.9 | 0.58 | 6.9  | 0.37 |
|                 | Solar PV        | 0.1  | 0.00 | 3.9  | 0.16 | 9.6   | 0.43 | 14.8 | 0.73 | 20.3 | 1.11 |
|                 | CSP             | 0.0  | 0.00 | 0.1  | 0.00 | 0.2   | 0.01 | 0.8  | 0.04 | 0.7  | 0.04 |
|                 | Onshore Wind    | 2.6  | 0.11 | 13.0 | 0.54 | 24.5  | 1.10 | 33.8 | 1.66 | 37.0 | 2.01 |
|                 | Offshore Wind   | 0.0  | 0.00 | 0.0  | 0.00 | 1.3   | 0.06 | 1.6  | 0.08 | 3.1  | 0.17 |
| C: 1.5C Pathway | Coal            | 50.6 | 2.05 | 16.2 | 0.67 | 0.2   | 0.01 | 0.0  | 0.00 | 0.0  | 0.00 |
|                 | Natural Gas     | 18.7 | 0.76 | 40.3 | 1.68 | 26.8  | 1.21 | 6.1  | 0.30 | 0.2  | 0.01 |
|                 | Natural Gas CCS | 0.0  | 0.00 | 0.0  | 0.00 | 0.0   | 0.00 | 7.1  | 0.35 | 3.1  | 0.17 |
|                 | Nuclear         | 19.7 | 0.80 | 0.74 | 17.7 | 0.68  | 15.0 | 11.5 | 0.58 | 5.5  | 0.30 |
|                 | Solar PV        | 0.1  | 0.00 | 3.9  | 0.16 | 14.1  | 0.64 | 19.5 | 0.97 | 27.8 | 1.55 |
|                 | CSP             | 0.0  | 0.00 | 0.1  | 0.00 | 0.2   | 0.01 | 1.2  | 0.06 | 1.4  | 0.08 |
|                 | Onshore Wind    | 2.6  | 0.11 | 13.0 | 0.54 | 33.7  | 1.52 | 44.2 | 2.21 | 49.9 | 2.78 |
|                 | Offshore Wind   | 0.0  | 0.00 | 0.0  | 0.00 | 1.2   | 0.06 | 1.7  | 0.09 | 4.2  | 0.23 |
| D: 80% RE 2050  | Coal            | 50.6 | 2.05 | 26.3 | 1.10 | 18.4  | 0.83 | 7.7  | 0.38 | 2.6  | 0.14 |
|                 | Natural Gas     | 18.7 | 0.76 | 35.1 | 1.46 | 26.5  | 1.19 | 20.2 | 0.99 | 10.8 | 0.60 |
|                 | Natural Gas CCS | 0.0  | 0.00 | 0.0  | 0.00 | 0.0   | 0.00 | 0.0  | 0.00 | 0.0  | 0.00 |
|                 | Nuclear         | 19.7 | 0.80 | 17.7 | 0.74 | 15.0  | 0.68 | 11.9 | 0.58 | 6.3  | 0.35 |
|                 | Solar PV        | 0.1  | 0.00 | 3.6  | 0.15 | 10.2  | 0.46 | 16.5 | 0.81 | 22.1 | 1.22 |
|                 | CSP             | 0.0  | 0.00 | 0.1  | 0.00 | 0.3   | 0.01 | 0.7  | 0.03 | 0.6  | 0.03 |
|                 | Onshore Wind    | 2.6  | 0.11 | 8.4  | 0.35 | 19.8  | 0.89 | 33.4 | 1.64 | 44.9 | 2.49 |
|                 | Offshore Wind   | 0.0  | 0.00 | 0.0  | 0.00 | 1.3   | 0.06 | 1.6  | 0.08 | 4.4  | 0.24 |
| E: 100% RE 2035 | Coal            | 50.6 | 2.05 | 26.3 | 1.10 | 0.9   | 0.04 | 0.0  | 0.00 | 0.0  | 0.00 |
|                 | Natural Gas     | 18.7 | 0.76 | 35.1 | 1.46 | 15.83 | 0.73 | 0.0  | 0.00 | 0.0  | 0.00 |
|                 | Natural Gas CCS | 0.0  | 0.00 | 0.0  | 0.00 | 0.0   | 0.00 | 0.0  | 0.00 | 0.0  | 0.00 |
|                 | Nuclear         | 19.7 | 0.80 | 17.7 | 0.74 | 9.7   | 0.44 | 0.0  | 0.00 | 0.0  | 0.00 |
|                 | Solar PV        | 0.1  | 0.00 | 3.6  | 0.15 | 16.8  | 0.77 | 35.0 | 1.84 | 31.0 | 1.78 |
|                 | CSP             | 0.0  | 0.00 | 0.1  | 0.00 | 0.4   | 0.02 | 9.6  | 0.51 | 9.8  | 0.56 |
|                 | Onshore Wind    | 2.6  | 0.11 | 8.4  | 0.35 | 45.9  | 2.10 | 45.3 | 2.39 | 48.4 | 2.78 |
|                 | Offshore Wind   | 0.0  | 0.00 | 0.0  | 0.00 | 1.2   | 0.05 | 1.5  | 0.08 | 3.5  | 0.20 |

|                    |                 |      |      |      |      |      |      |      |      |      |      |
|--------------------|-----------------|------|------|------|------|------|------|------|------|------|------|
| F: 100% RE 2050    | Coal            | 50.6 | 2.05 | 26.3 | 1.10 | 13.0 | 0.59 | 2.1  | 0.11 | 0.0  | 0.00 |
|                    | Natural Gas     | 18.7 | 0.76 | 35.1 | 1.46 | 25.2 | 1.14 | 13.7 | 0.68 |      |      |
|                    | Natural Gas CCS | 0.0  | 0.00 | 0.0  | 0.00 | 0.0  | 0.00 | 0.0  | 0.00 | 0.0  | 0.00 |
|                    | Nuclear         | 19.7 | 0.80 | 17.7 | 0.74 | 15.0 | 0.68 | 10.7 | 0.53 | 0.0  | 0.00 |
|                    | Solar PV        | 0.1  | 0.00 | 3.6  | 0.15 | 10.8 | 0.49 | 16.8 | 0.83 | 35.9 | 2.05 |
|                    | CSP             | 0.0  | 0.00 | 0.1  | 0.00 | 0.3  | 0.01 | 1.1  | 0.05 | 3.3  | 0.19 |
|                    | Onshore Wind    | 2.6  | 0.11 | 8.4  | 0.35 | 25.7 | 1.16 | 45.7 | 2.26 | 49.3 | 2.81 |
|                    | Offshore Wind   | 0.0  | 0.00 | 0.0  | 0.00 | 1.3  | 0.06 | 1.7  | 0.08 | 4.6  | 0.26 |
| G: Low Carbon 2035 | Coal            | 50.6 | 2.05 | 26.3 | 1.10 | 4.8  | 0.22 | 0.0  | 0.00 | 0.0  | 0.00 |
|                    | Natural Gas     | 18.7 | 0.76 | 35.1 | 1.46 | 21.8 | 0.98 | 0.0  | 0.00 | 0.0  | 0.00 |
|                    | Natural Gas CCS | 0.0  | 0.00 | 0.0  | 0.00 | 0.2  | 0.01 | 13.7 | 0.69 | 11.0 | 0.61 |
|                    | Nuclear         | 19.7 | 0.80 | 17.7 | 0.74 | 15.0 | 0.68 | 11.4 | 0.58 | 6.5  | 0.36 |
|                    | Solar PV        | 0.1  | 0.00 | 3.6  | 0.15 | 14.0 | 0.63 | 22.7 | 1.15 | 23.7 | 1.32 |
|                    | CSP             | 0.0  | 0.00 | 0.1  | 0.00 | 0.2  | 0.01 | 1.3  | 0.07 | 1.2  | 0.07 |
|                    | Onshore Wind    | 2.6  | 0.11 | 8.4  | 0.35 | 34.2 | 1.54 | 40.1 | 2.03 | 45.1 | 2.52 |
|                    | Offshore Wind   | 0.0  | 0.00 | 0.0  | 0.00 | 1.2  | 0.06 | 1.6  | 0.08 | 3.8  | 0.02 |
| H: Low Carbon 2050 | Coal            | 50.6 | 2.05 | 26.3 | 1.10 | 22.3 | 1.00 | 6.1  | 0.30 | 0.0  | 0.00 |
|                    | Natural Gas     | 18.7 | 0.76 | 35.1 | 1.46 | 31.0 | 1.39 | 20.5 | 1.00 | 0.0  | 0.00 |
|                    | Natural Gas CCS | 0.0  | 0.00 | 0.0  | 0.00 | 0.0  | 0.00 | 0.0  | 0.00 | 6.7  | 0.37 |
|                    | Nuclear         | 19.7 | 0.80 | 17.7 | 0.74 | 15.1 | 0.68 | 11.9 | 0.58 | 5.7  | 0.32 |
|                    | Solar PV        | 0.1  | 0.00 | 3.6  | 0.15 | 7.8  | 0.35 | 15.5 | 0.76 | 26.5 | 1.48 |
|                    | CSP             | 0.0  | 0.00 | 0.1  | 0.00 | 0.3  | 0.01 | 0.8  | 0.04 | 0.8  | 0.05 |
|                    | Onshore Wind    | 2.6  | 0.11 | 8.4  | 0.35 | 13.9 | 0.62 | 35.8 | 1.75 | 47.7 | 2.67 |
|                    | Offshore Wind   | 0.0  | 0.00 | 0.0  | 0.00 | 1.3  | 0.06 | 1.6  | 0.08 | 4.4  | 0.24 |

## E. National Emissions

The operating emissions are a function of the fuel emissions rate ( $e_f$ ) in pounds/MMBtu, heat rate ( $H$ ) in MMBtu/MWh, generation ( $g_{n,t}$ ) for each technology ( $n$ ) in each year ( $t$ ) in MWh, and pounds to grams conversion ( $\alpha$ ) (Equation S-1). The total operating emissions are the sum of emissions from each technology ( $n$ ).

$$E_O = \sum_{i=1}^n g_n e_{f,n} H_n \alpha \quad (S-2)$$

Figures S-3 – S-6 display the national operating emission by technology 2010 – 2050 across each scenario and for each pollutant. For operating emissions, natural gas and coal technologies contribute most emissions. For SO<sub>2</sub> and PM<sub>2.5</sub> emissions, coal technologies contribute to 99% of operating emissions across all technologies.

Figure S-7 displays the national emissions ratio between PM<sub>2.5</sub> emissions and total generation (in kg/MWh). We find that the 1.5 C decarbonization pathway (Scenario C) often has the lowest or second lowest ratio over the entire modeling horizon. This most likely stems from Scenario C (1.5 C decarbonization pathway) retiring the entire coal fleet in the same period as Scenario E (100% RE by 2035). The scenarios with 100% RE generation achieve the lowest national emissions ratios in their mandate years.

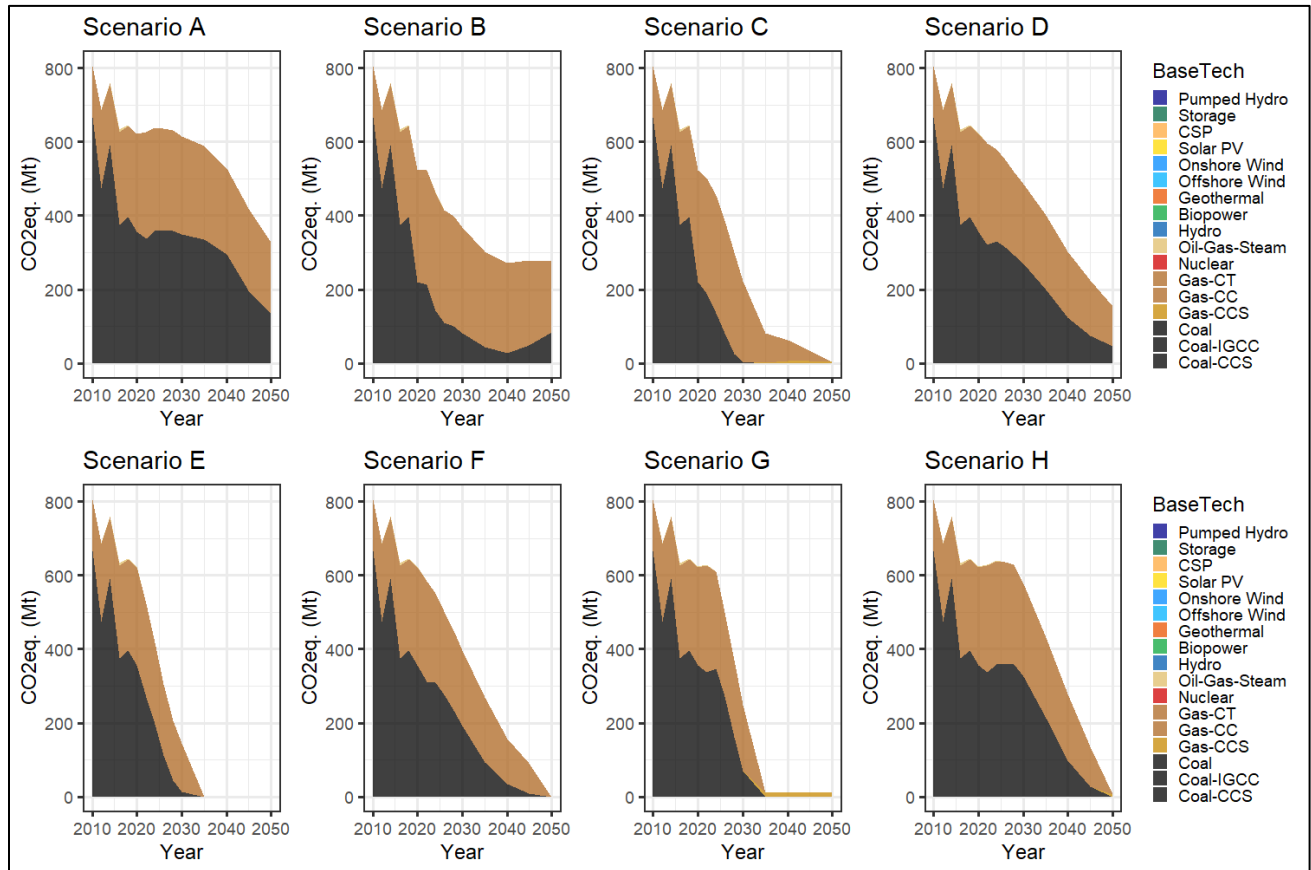

**Figure S-3:** National operating CO<sub>2</sub> emissions by technology 2010 – 2050.

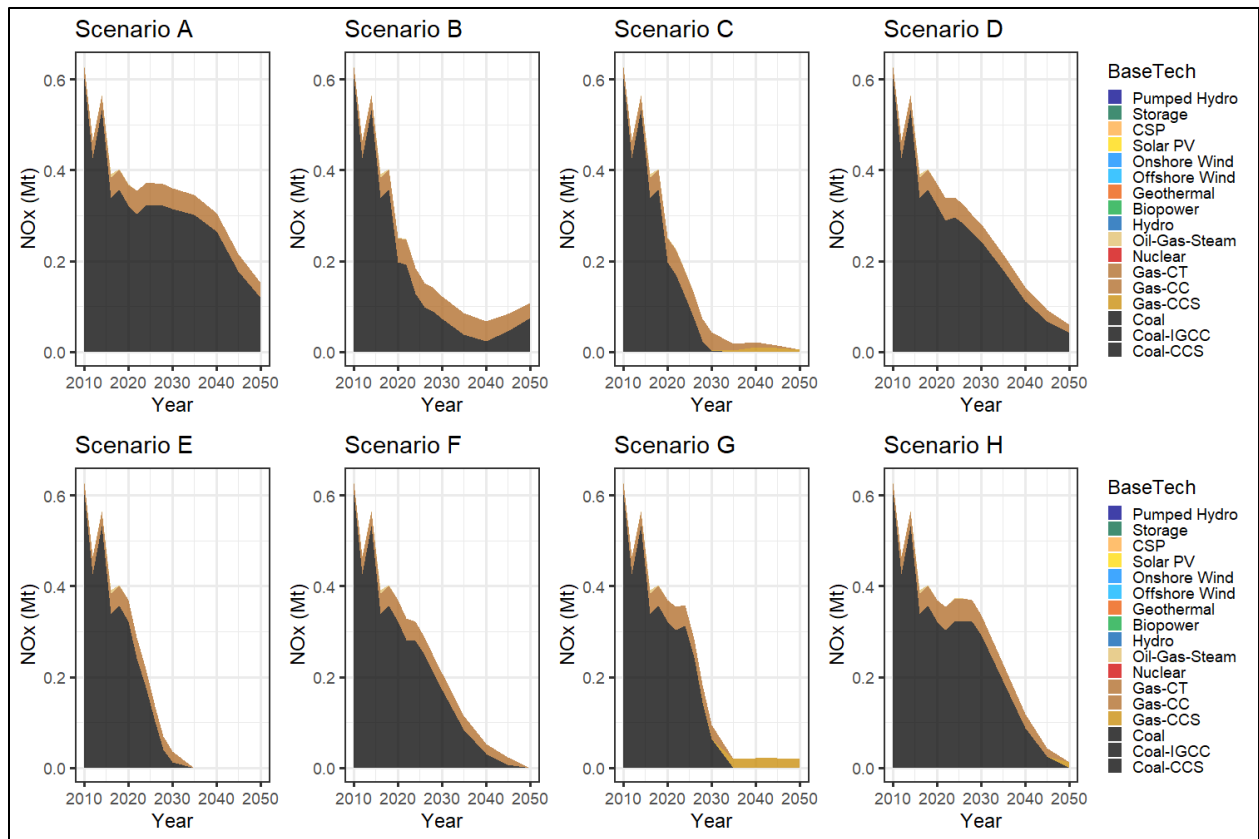

**Figure S-4:** National operating NO<sub>x</sub> emissions by technology 2010 – 2050.

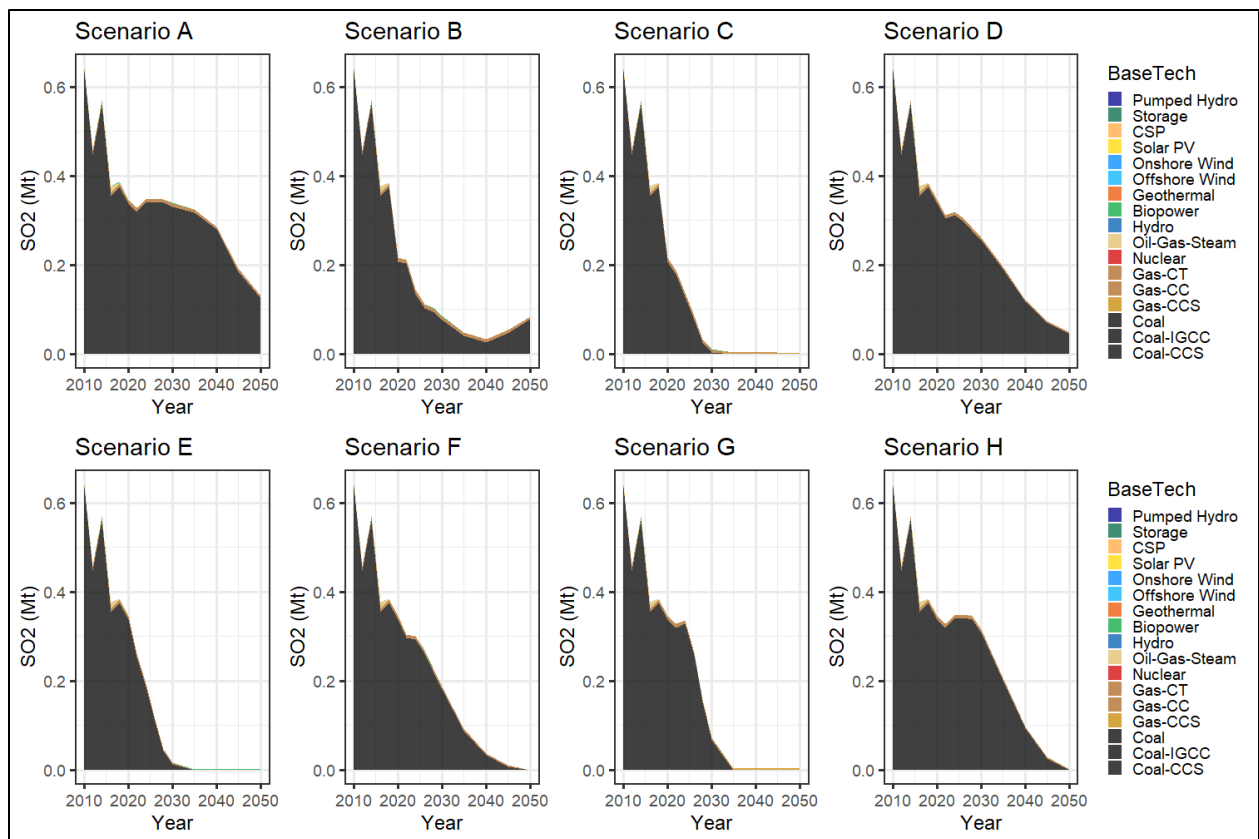

**Figure S-5:** National operating SO<sub>2</sub> emissions by technology 2010 – 2050.



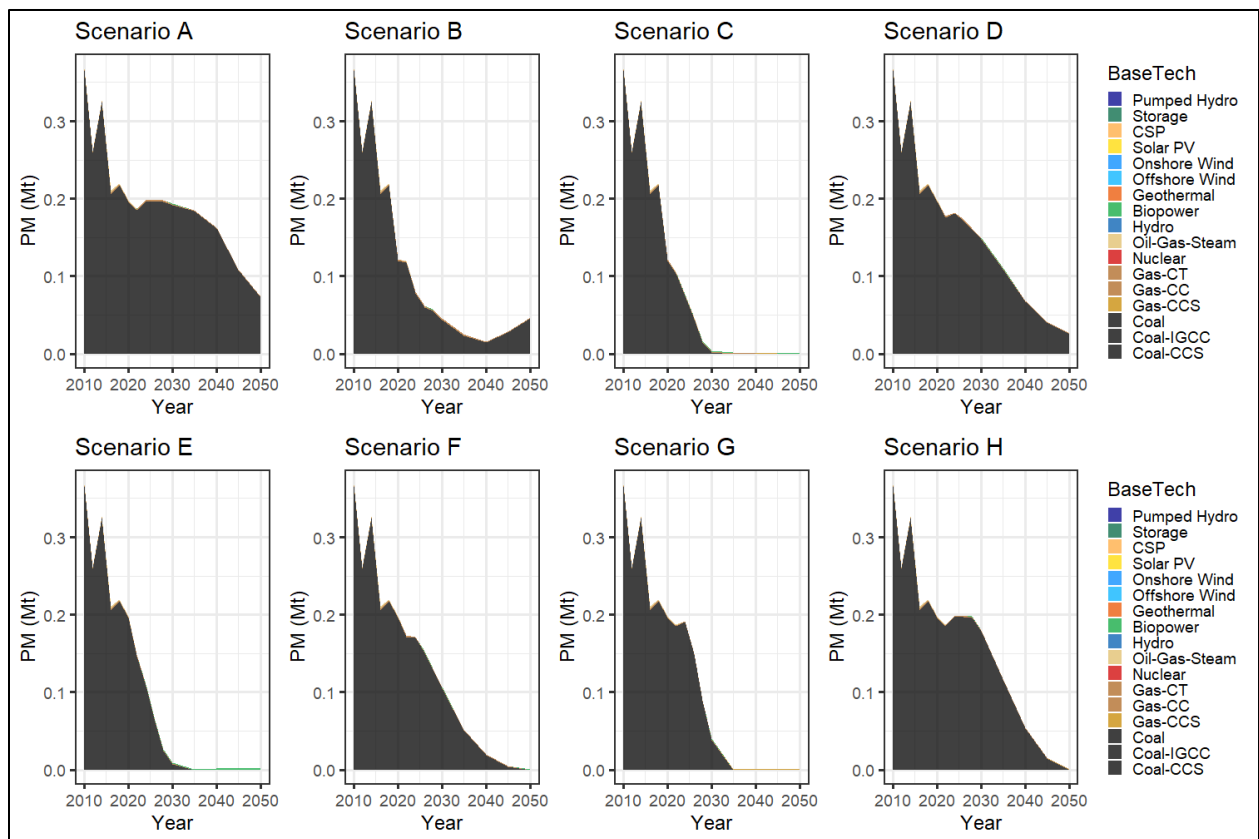

**Figure S-6:** National operating  $PM_{2.5}$  emissions by technology 2010 – 2050.

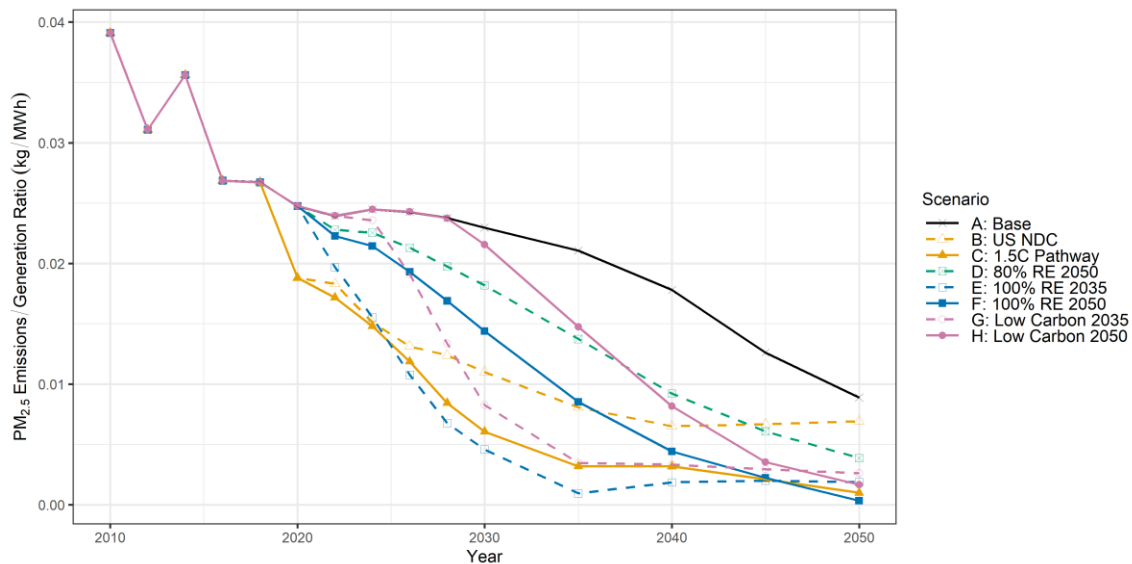

**Figure S-7:** Ratio between  $PM_{2.5}$  emissions and generation (in kg/MWh). This shows the national emissions ratio of  $PM_{2.5}$  emissions per MWh generation. We see this is a similar trend across scenarios as to the national  $PM_{2.5}$  emissions (see Figure 2 of the main text).

## F. Regional Air Pollution Analysis

Figures S-8 and S-9 show the NO<sub>x</sub> and SO<sub>2</sub> emissions distribution in 2020, 2035, and 2050.

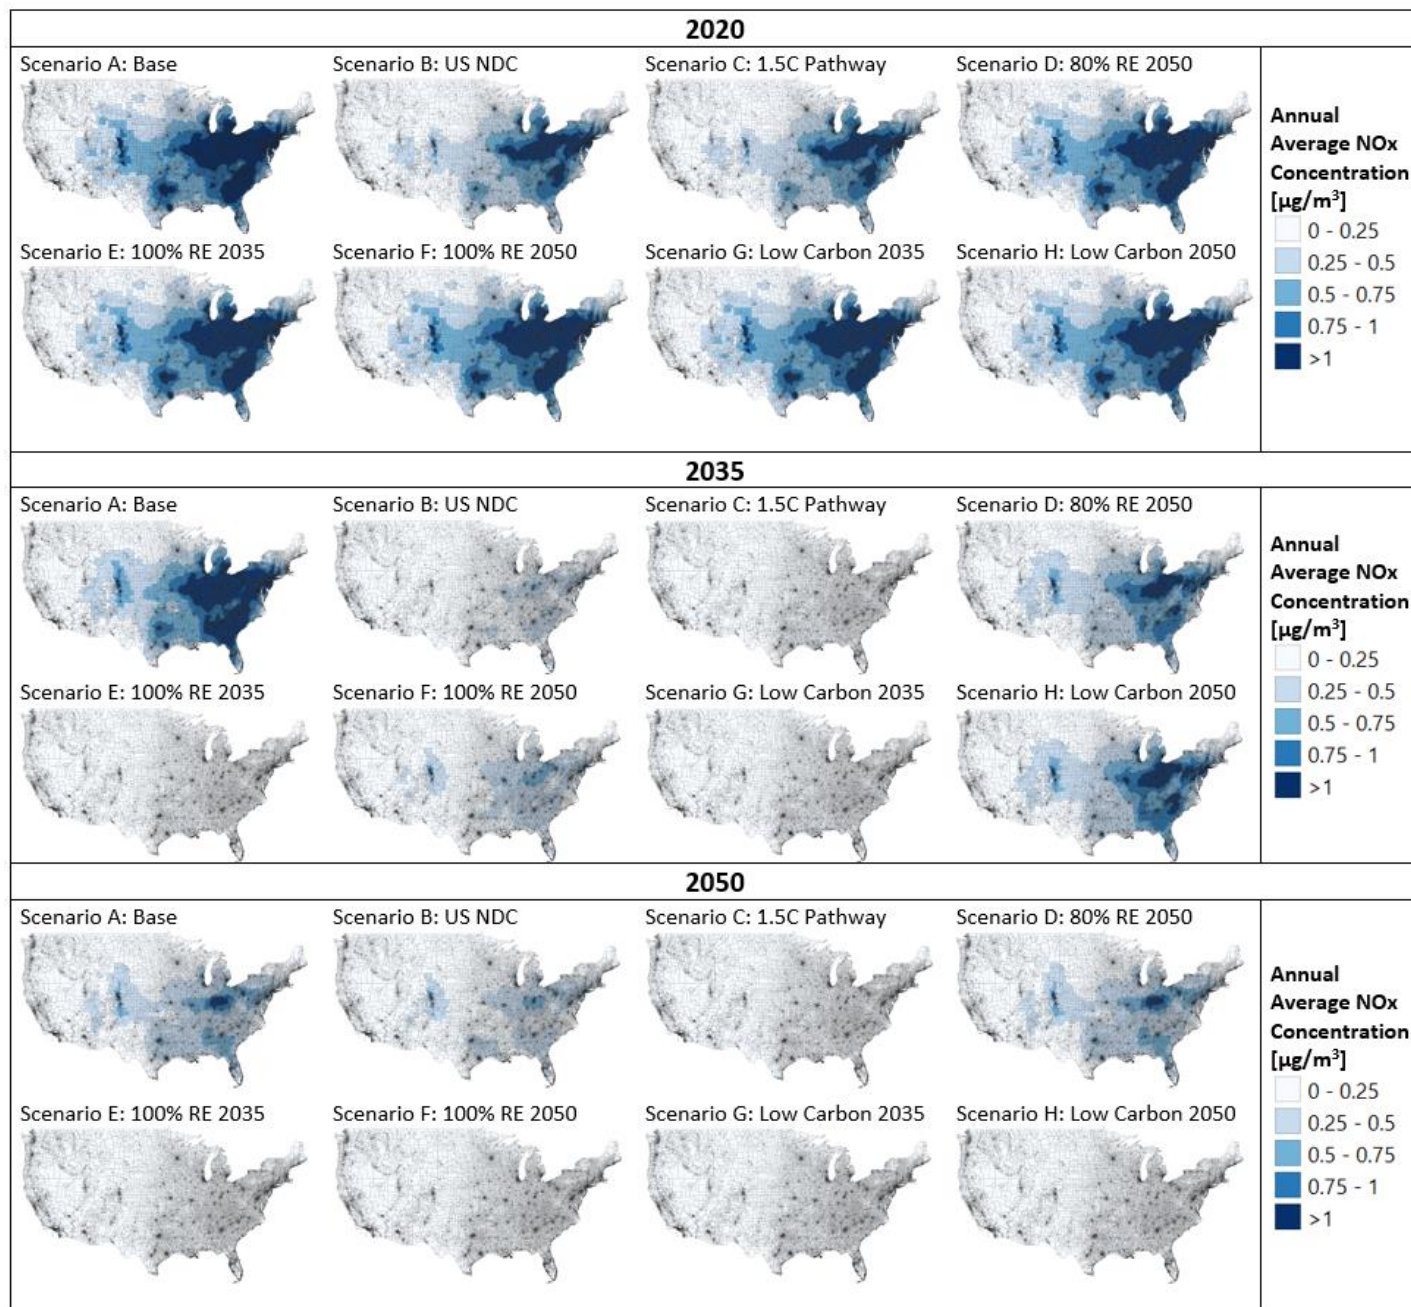

**Figure S-8:** Distribution of NO<sub>x</sub> emissions 2020, 2035, and 2050.

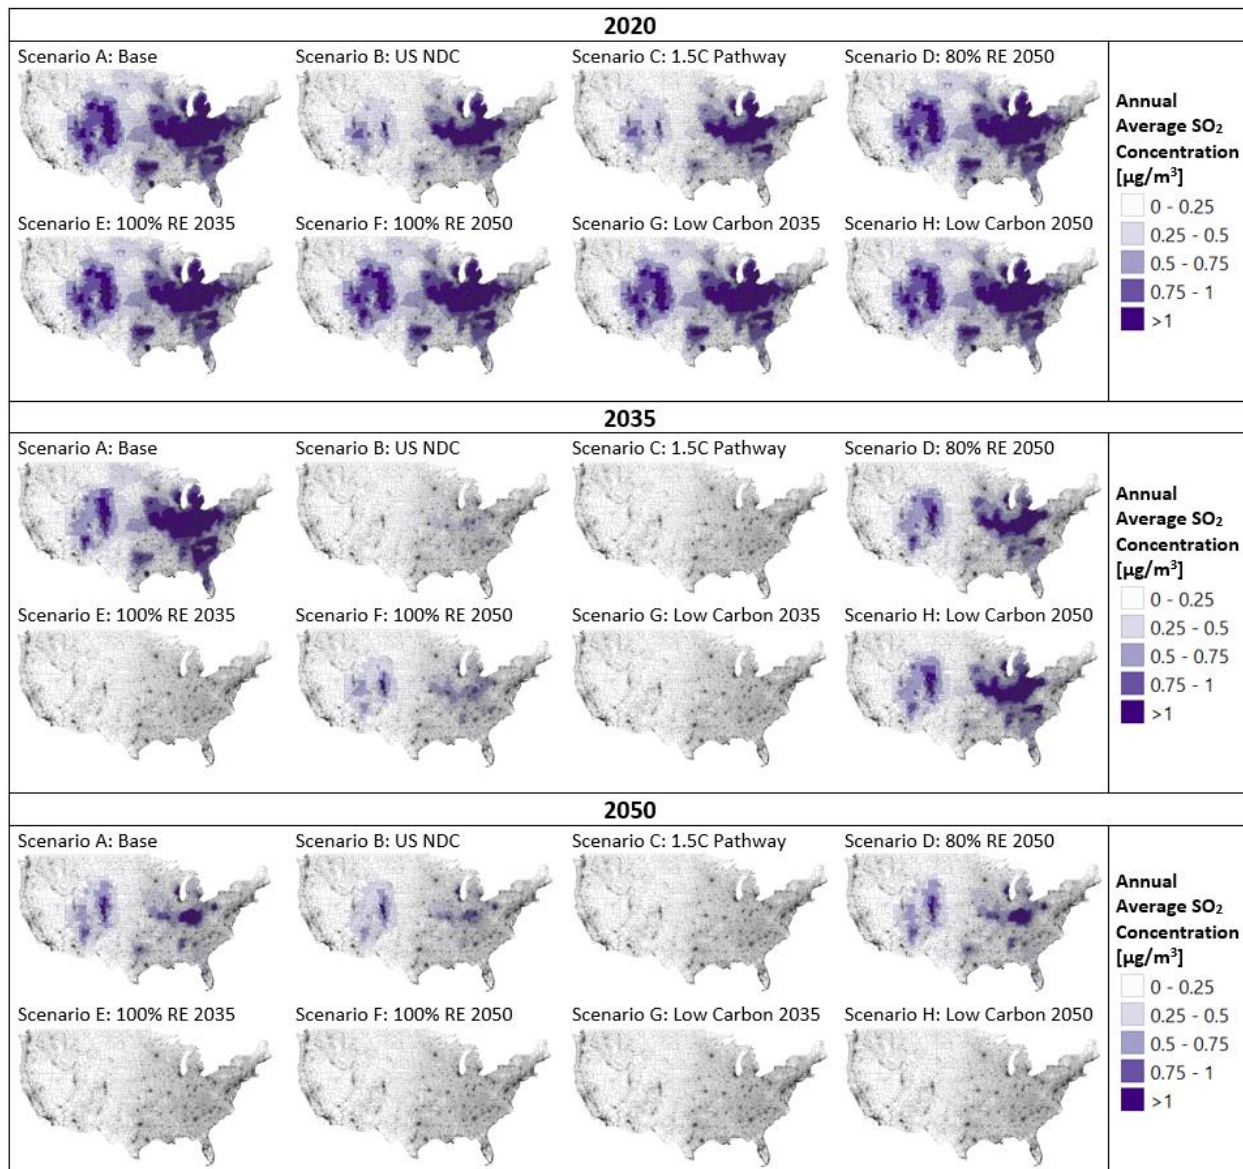

**Figure S-9:** Distribution of SO<sub>2</sub> emissions 2020, 2035, and 2050.

## G. Air Pollution Equality Assessments

Here we present the air pollution equality assessments in our analysis. Table S-5 shows the groups and respective sample sizes for the equality analysis. Table S-6 shows the reductions in PM<sub>2.5</sub> concentrations per billion metric tons of CO<sub>2</sub> reduced from 2020 to 2050. A value of one indicates that the rate of change of PM<sub>2.5</sub> (in µg per m<sup>3</sup>) is the same as the rate of change of CO<sub>2</sub> (in billion metric tons). A value of less than one indicates that the rate of reductions in CO<sub>2</sub> are greater than the rate of reductions in local pollutants. This ratio is useful for understanding the impact of decarbonization policies on the rate of reduction of PM<sub>2.5</sub> in relation to CO<sub>2</sub>. From Table S-6 we see that Scenario D (80% renewable energy by 2050) has the highest reduction of PM<sub>2.5</sub> compared to billion metric tons of CO<sub>2</sub> reduced. This means that we see the most benefit in health impacts (represented as reductions in PM<sub>2.5</sub> concentrations) from reaching 80% renewable energy by 2050 per billion metric tons of CO<sub>2</sub> reduced. Scenario A has the third highest ratio, but overall has the worst health impacts due to this scenario having the highest level of total emissions.

Figures S-10 and S-11 show the population weighted annual average NO<sub>x</sub> and SO<sub>2</sub> concentration across racial or ethnic groups in all scenarios 2020 – 2050. Interestingly we find that Black communities are always worse off than their racial/ethnic counterparts. Figure S-12, S-13, and S-14 show the population weighted PM<sub>2.5</sub>, NO<sub>x</sub>, and SO<sub>2</sub> concentration across all income groups and scenarios 2020 to 2050 respectively. Figure S-15 shows the population weighted PM<sub>2.5</sub> concentration across race and ethnicity groups for the two highest and two lowest income groups. We see that even within income groups, Black communities are burdened with the most air pollution. Figure 16 shows the absolute change of PM<sub>2.5</sub> concentration over race and ethnicity groups, showing that Black communities see the largest reductions over the energy transition. Figure 17 shows the percent change of PM<sub>2.5</sub> with respect to the starting point in 2020 across race and ethnicity groups and scenarios. We see that the percent change across race and ethnicity groups within scenarios is the same over each modeling period, indicating that starting points in 2020 impacts air pollution exposure over the energy transition. Figures S-18 and S-19 show the population weighted NO<sub>x</sub> and SO<sub>2</sub> concentration respectively across scenarios and poverty groups. Figure S-20 shows the distribution of percent Black and non-Latinx white census tracts and PM<sub>2.5</sub> regional distribution in 2020 and 2050.

**Table S-5:** Equality groups and their respective sample sizes. Emission concentrations were averaged over these groups to get the population weighted average annual concentration in each group.

|                                                                   | <b>Groups</b>    | <b>Sample Size<br/>(number of<br/>census tracts)</b> |
|-------------------------------------------------------------------|------------------|------------------------------------------------------|
| Population in<br>census tract<br>below the<br>Poverty Line<br>(%) | [0, 10%]         | 26,850                                               |
|                                                                   | (10%, 20%]       | 22,897                                               |
|                                                                   | (20%, 30%]       | 11,611                                               |
|                                                                   | (30%, 50%]       | 8,621                                                |
|                                                                   | (50%, 70%]       | 1,389                                                |
|                                                                   | (70%, 100%]      | 189                                                  |
| Median<br>Income                                                  | [0, \$25k]       | 4,458                                                |
|                                                                   | (\$25k, \$50k]   | 29,389                                               |
|                                                                   | (\$50k, \$75k]   | 22,710                                               |
|                                                                   | (\$75k, \$100k]  | 8,942                                                |
|                                                                   | (\$100k, \$125k] | 3,843                                                |
|                                                                   | (\$125k, \$150k] | 1,294                                                |
|                                                                   | (\$150k,]        | 890                                                  |

**Table S-6:** Ratio of reductions in PM<sub>2.5</sub> concentration per billion metric tons of CO<sub>2</sub> from 2020 to 2050 (in  $\mu\text{g}\cdot\text{m}^{-3}$  per billion metric tons). The PM reductions are calculated as a population weighted annual average.

| Decarbonization Scenario     | Black | Non-Latinx<br>White | Asian | Latinx/<br>Hispanic | Indigenous |
|------------------------------|-------|---------------------|-------|---------------------|------------|
| Scenario D – 80% RE 2050     | 0.568 | 0.474               | 0.32  | 0.291               | 0.311      |
| Scenario F – 100% RE 2050    | 0.527 | 0.45                | 0.302 | 0.28                | 0.305      |
| Scenario A – Base            | 0.526 | 0.442               | 0.308 | 0.269               | 0.29       |
| Scenario H – Low Carbon 2050 | 0.526 | 0.45                | 0.301 | 0.278               | 0.305      |
| Scenario G – Low Carbon 2035 | 0.525 | 0.449               | 0.299 | 0.276               | 0.304      |
| Scenario E – 100% RE 2035    | 0.523 | 0.448               | 0.301 | 0.279               | 0.303      |
| Scenario C – 1.5°C           | 0.347 | 0.295               | 0.195 | 0.169               | 0.183      |
| Scenario B – US NDC          | 0.327 | 0.271               | 0.18  | 0.144               | 0.154      |



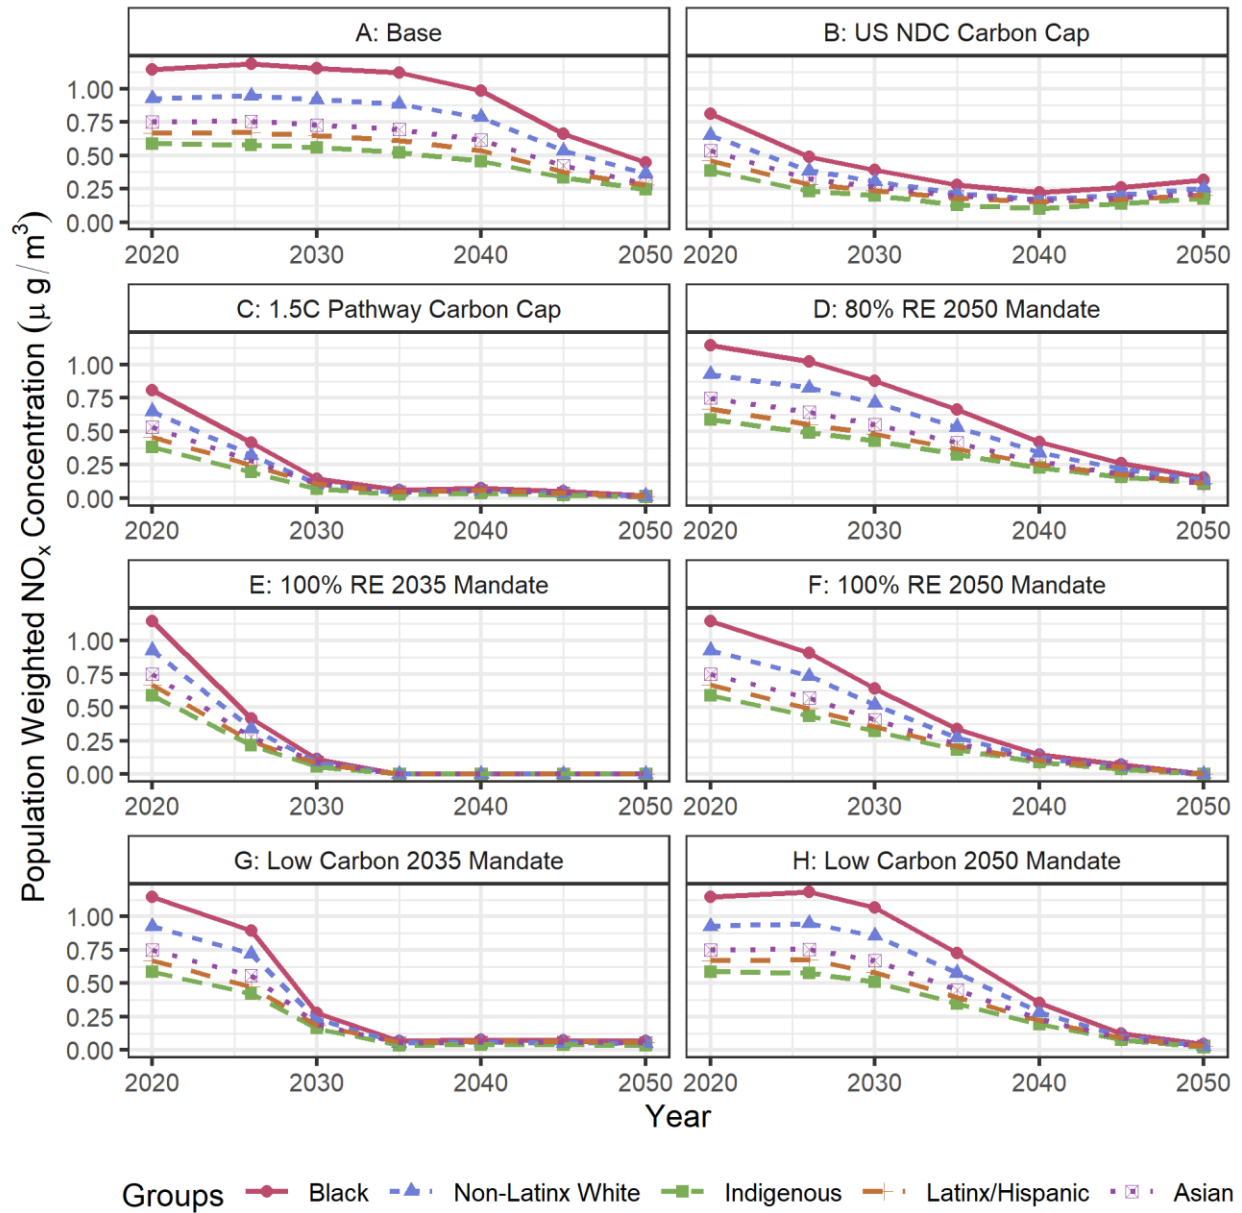

**Figure S-10:** Population weighted annual average NO<sub>x</sub> concentration across race and ethnicity groups. We see black populations reside in areas with high NO<sub>x</sub> concentrations across all decarbonization scenarios and time periods.

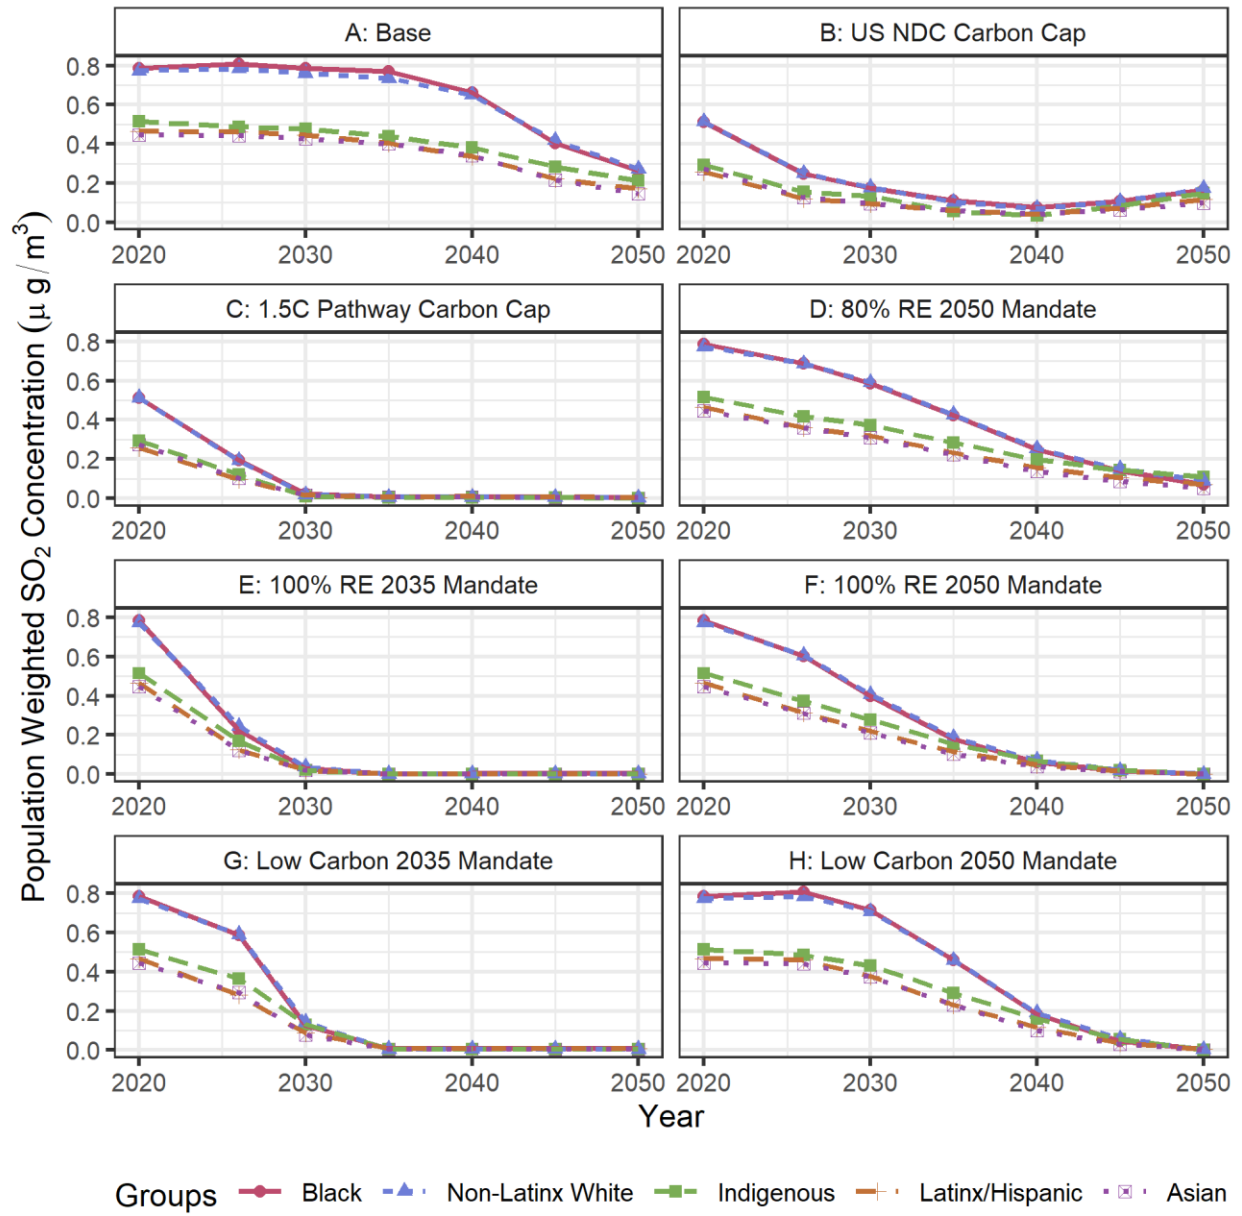

**Figure S-11:** Population weighted annual average SO<sub>2</sub> concentration across race and ethnicity groups.

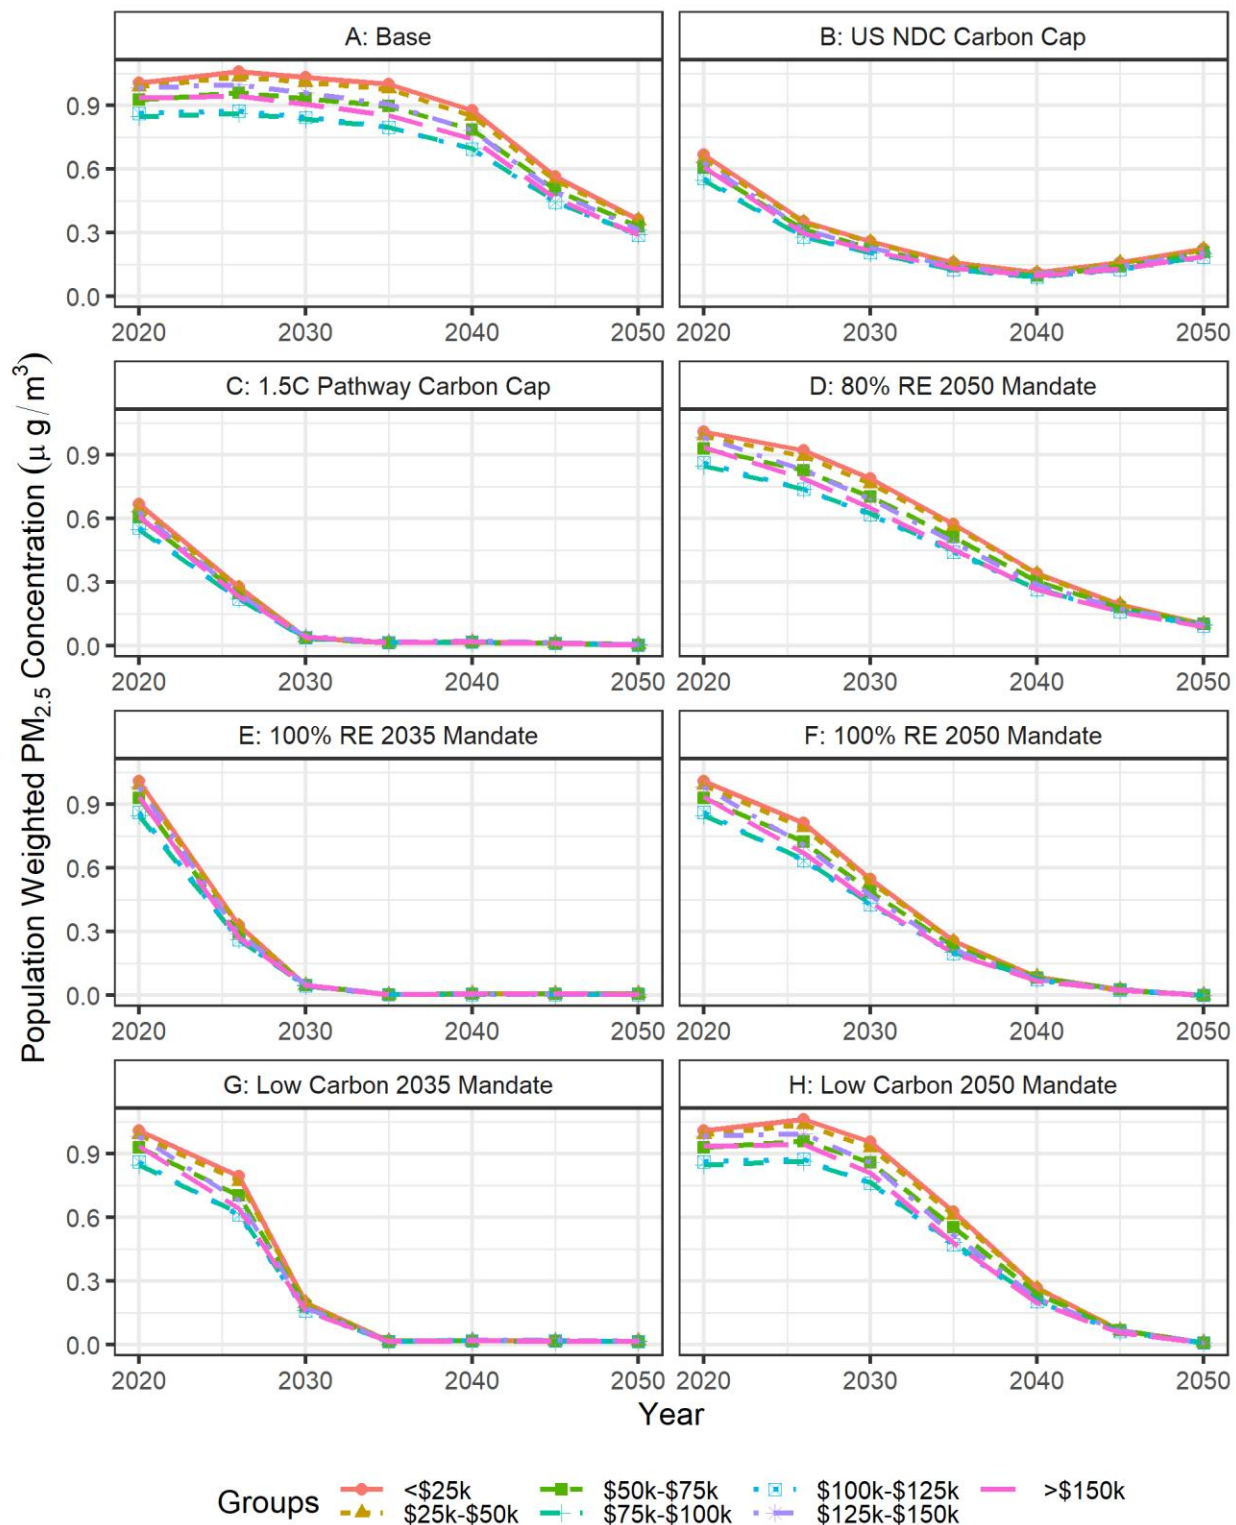

**Figure S-12:** Population weighted PM<sub>2.5</sub> concentration across all income groups and scenarios from 2020 – 2050.

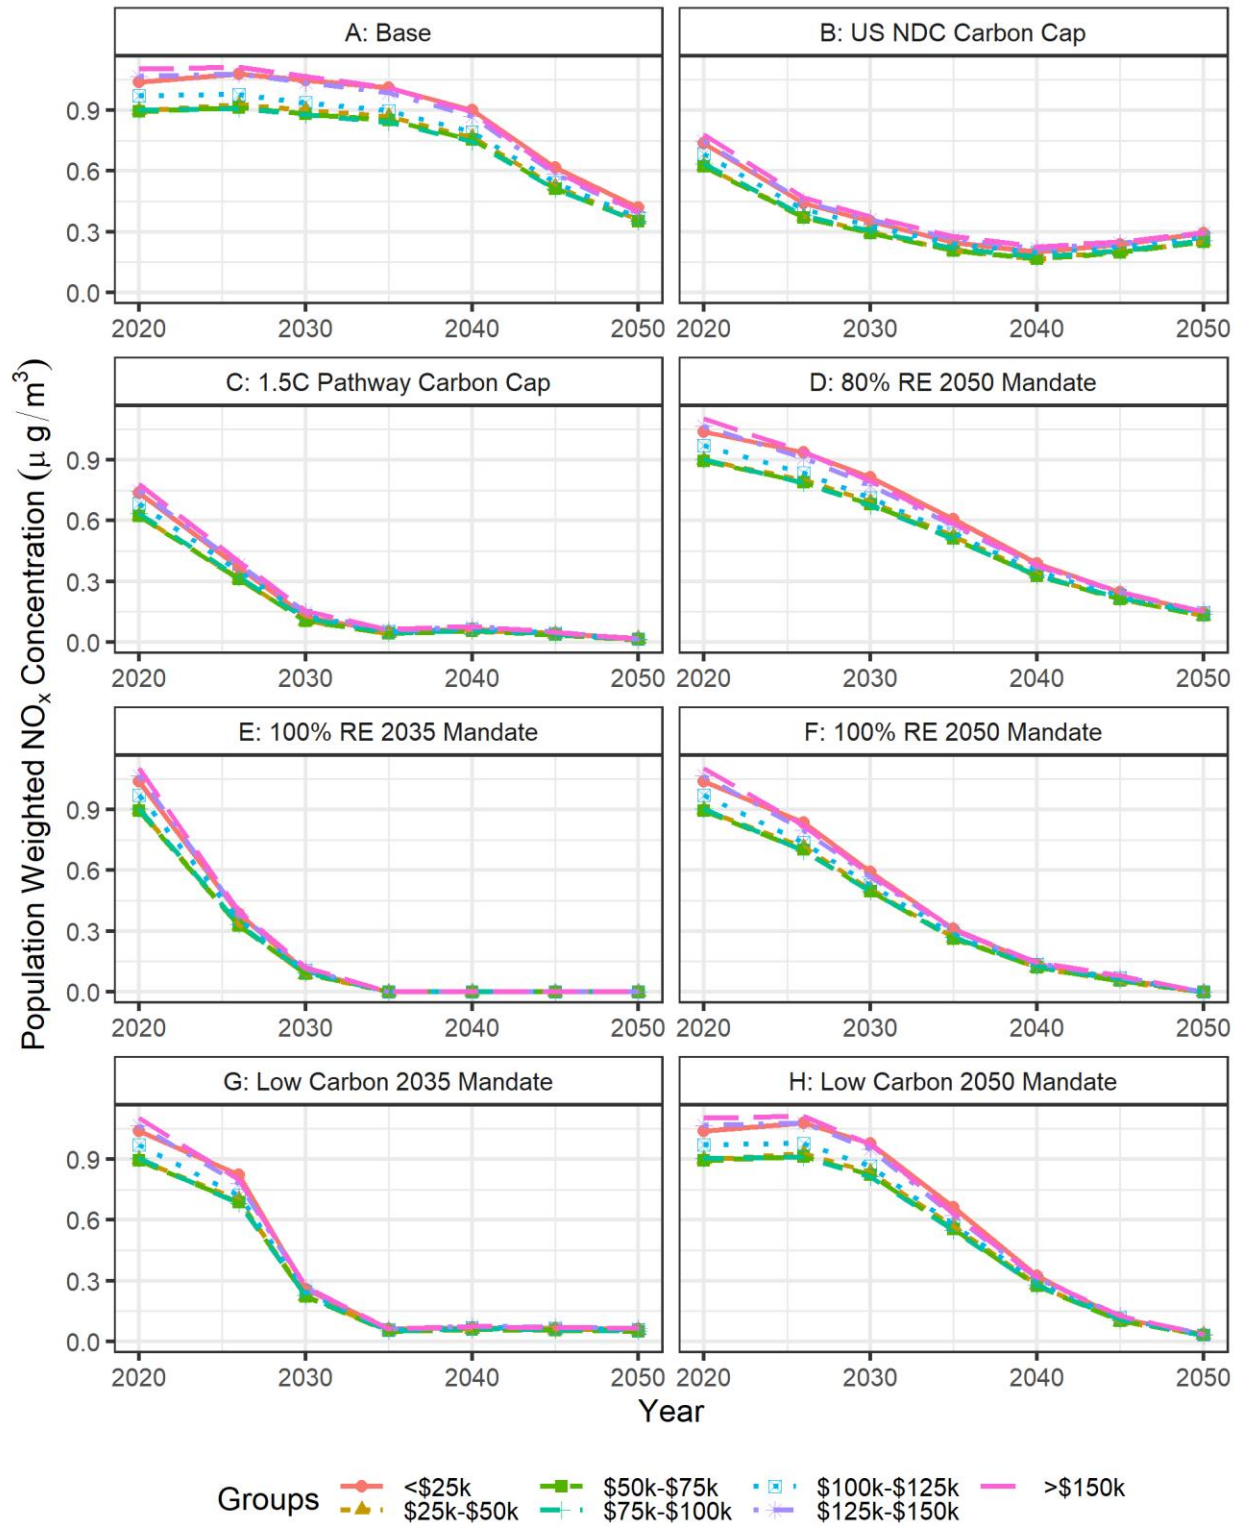

**Figure S-13:** Population weighted NO<sub>x</sub> concentration across all income groups and scenarios 2020 – 2050.

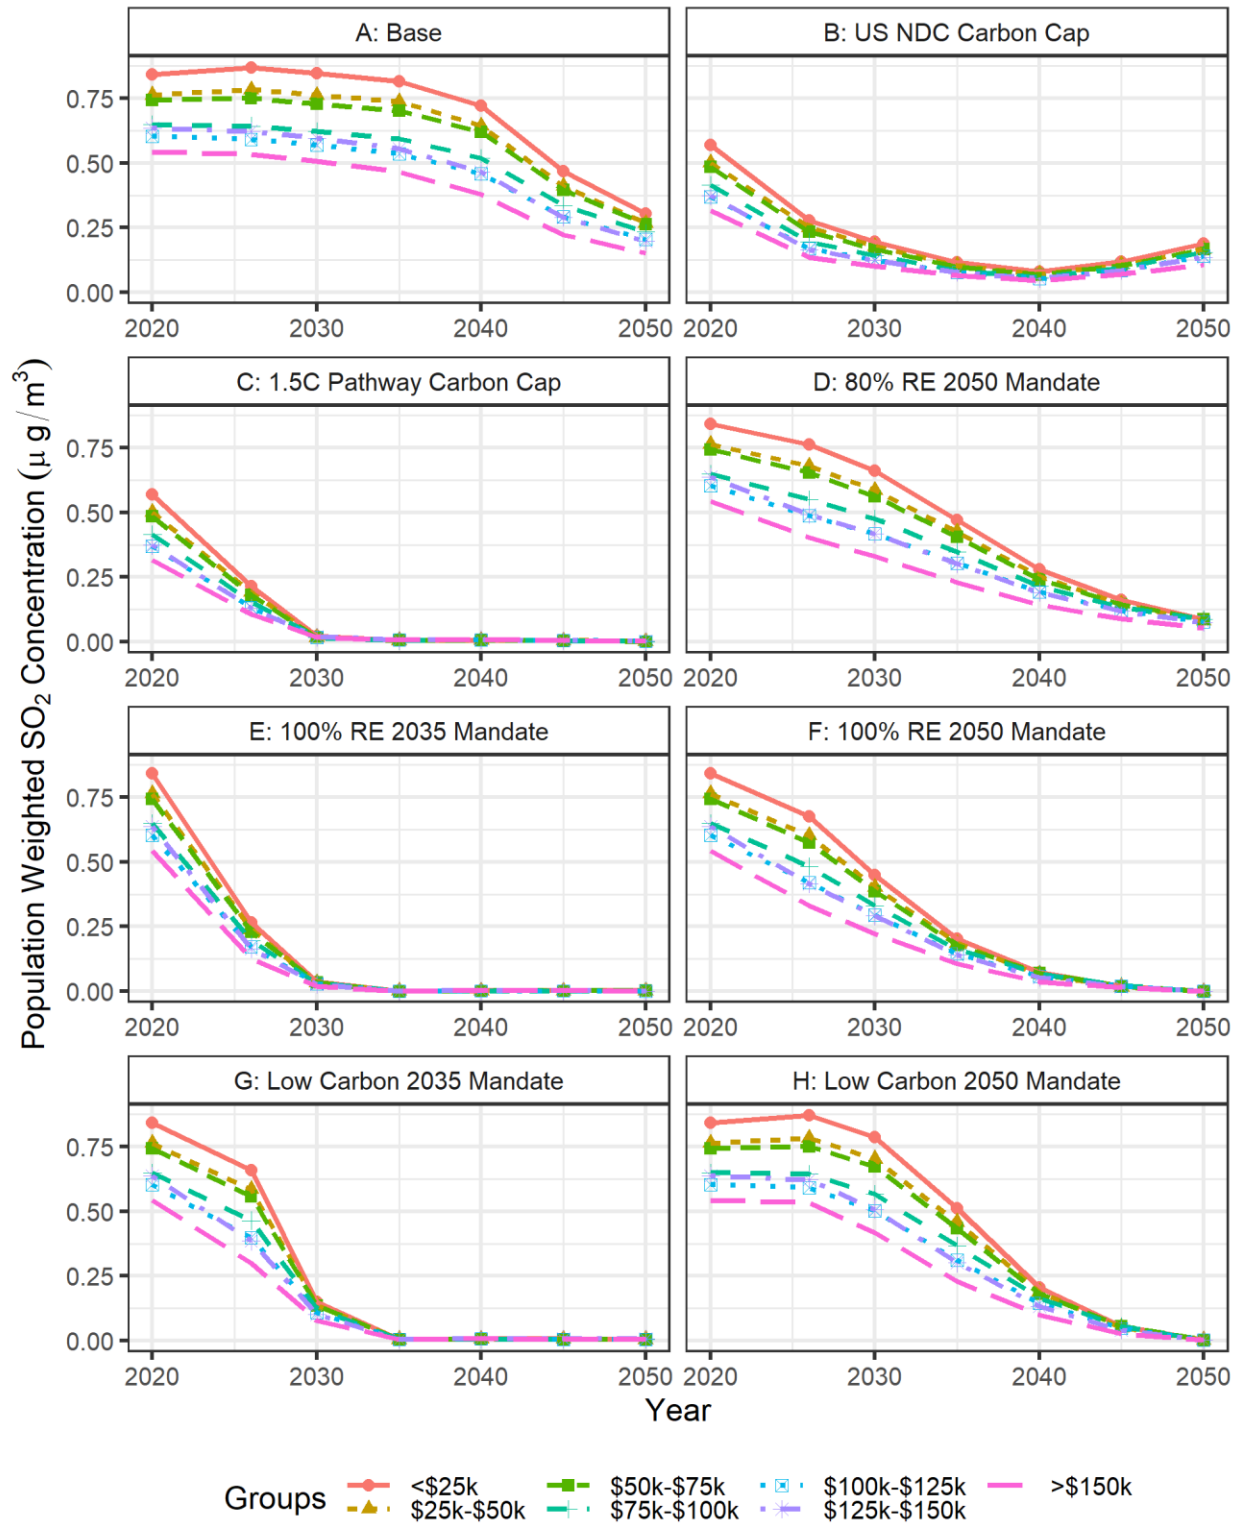

**Figure S-14:** Population weighted SO<sub>2</sub> concentration across all income groups and scenarios 2020 – 2050.



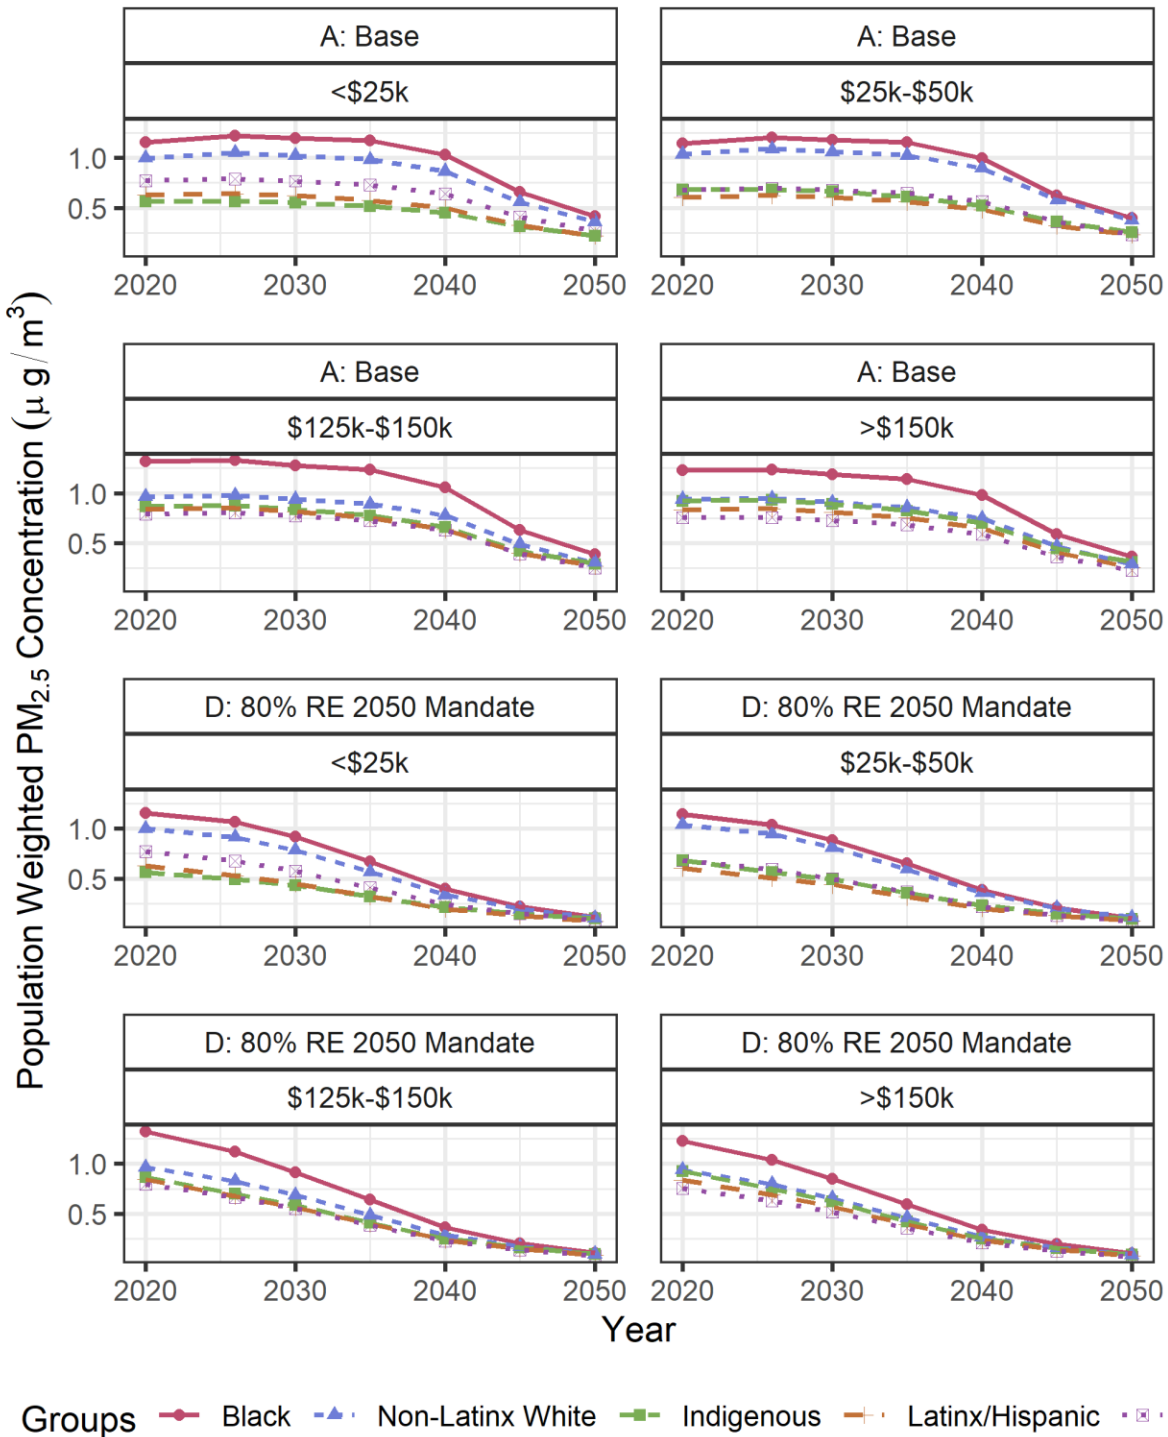

**Figure S-15:** Distribution of population weighted PM<sub>2.5</sub> concentration across race and ethnicity in the two highest (\$125k-\$150k and >\$150k) and two lowest (<\$25k and \$25k-\$50k) median income brackets for Scenario A (Base Case) and Scenario D (80% RE by 2050 Mandate). This shows that across income groups, Black people are exposed to the highest concentrations of PM<sub>2.5</sub>.

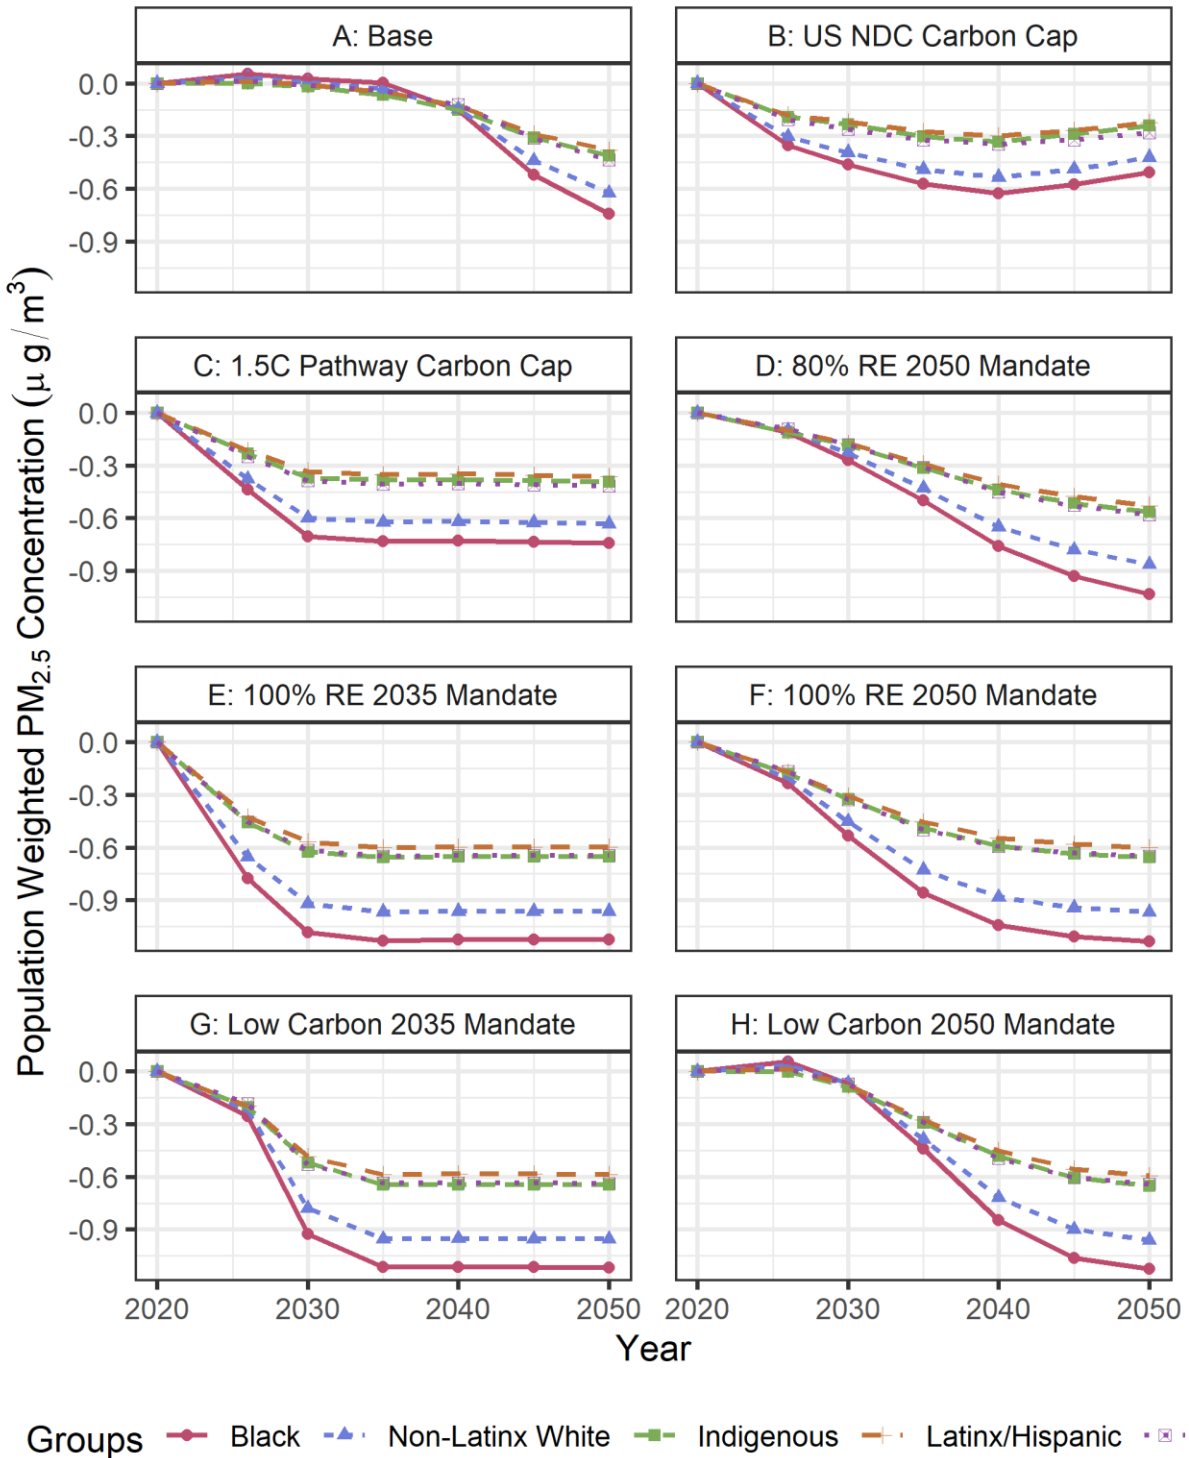

**Figure S-16:** Absolute changes in population weighted PM<sub>2.5</sub> concentrations (in  $\mu\text{g}/\text{m}^3$ ) across race and ethnicity groups for each scenario 2020 – 2050.

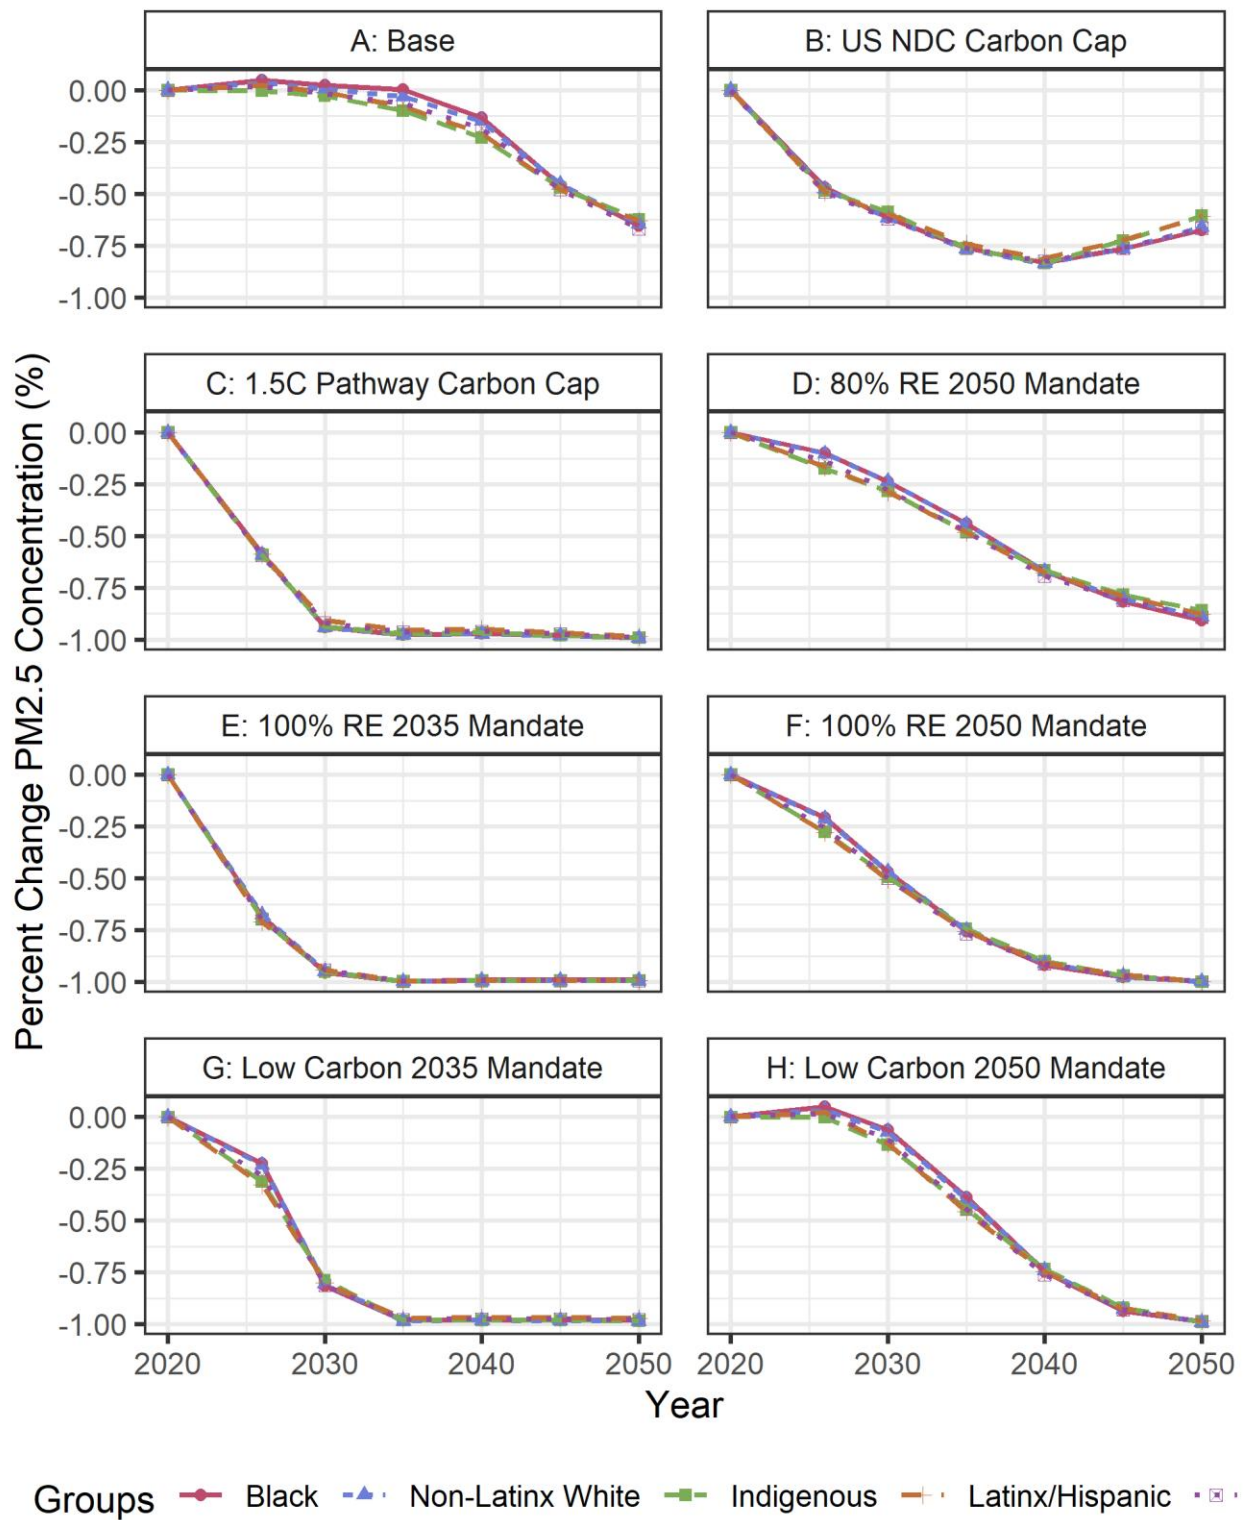

**Figure S-17:** Percent change of population weighted  $PM_{2.5}$  concentration across race and ethnicity groups for each scenario over the energy transition 2020 – 2050.

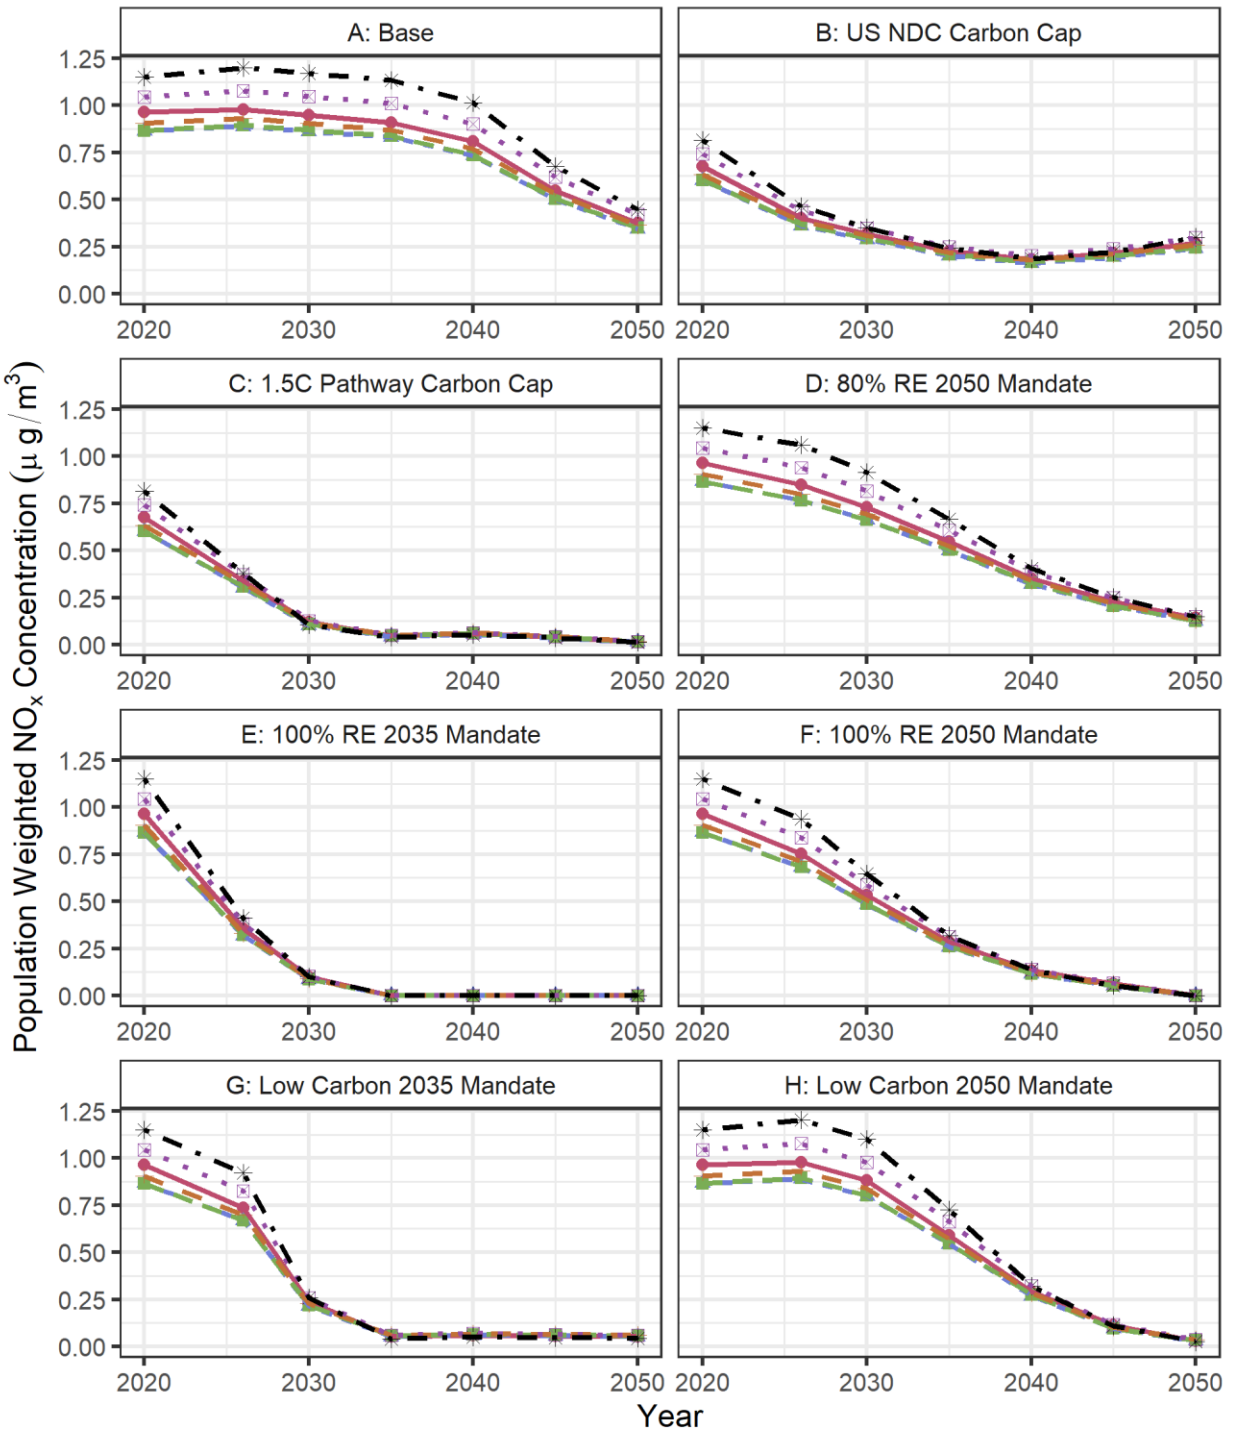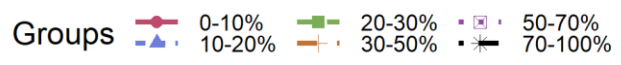

**Figure S-18:** Population weighted NO<sub>x</sub> concentration across poverty rate groups. We see that areas with high poverty rates reside in areas with high NO<sub>x</sub> concentrations across all decarbonization scenarios and time periods.

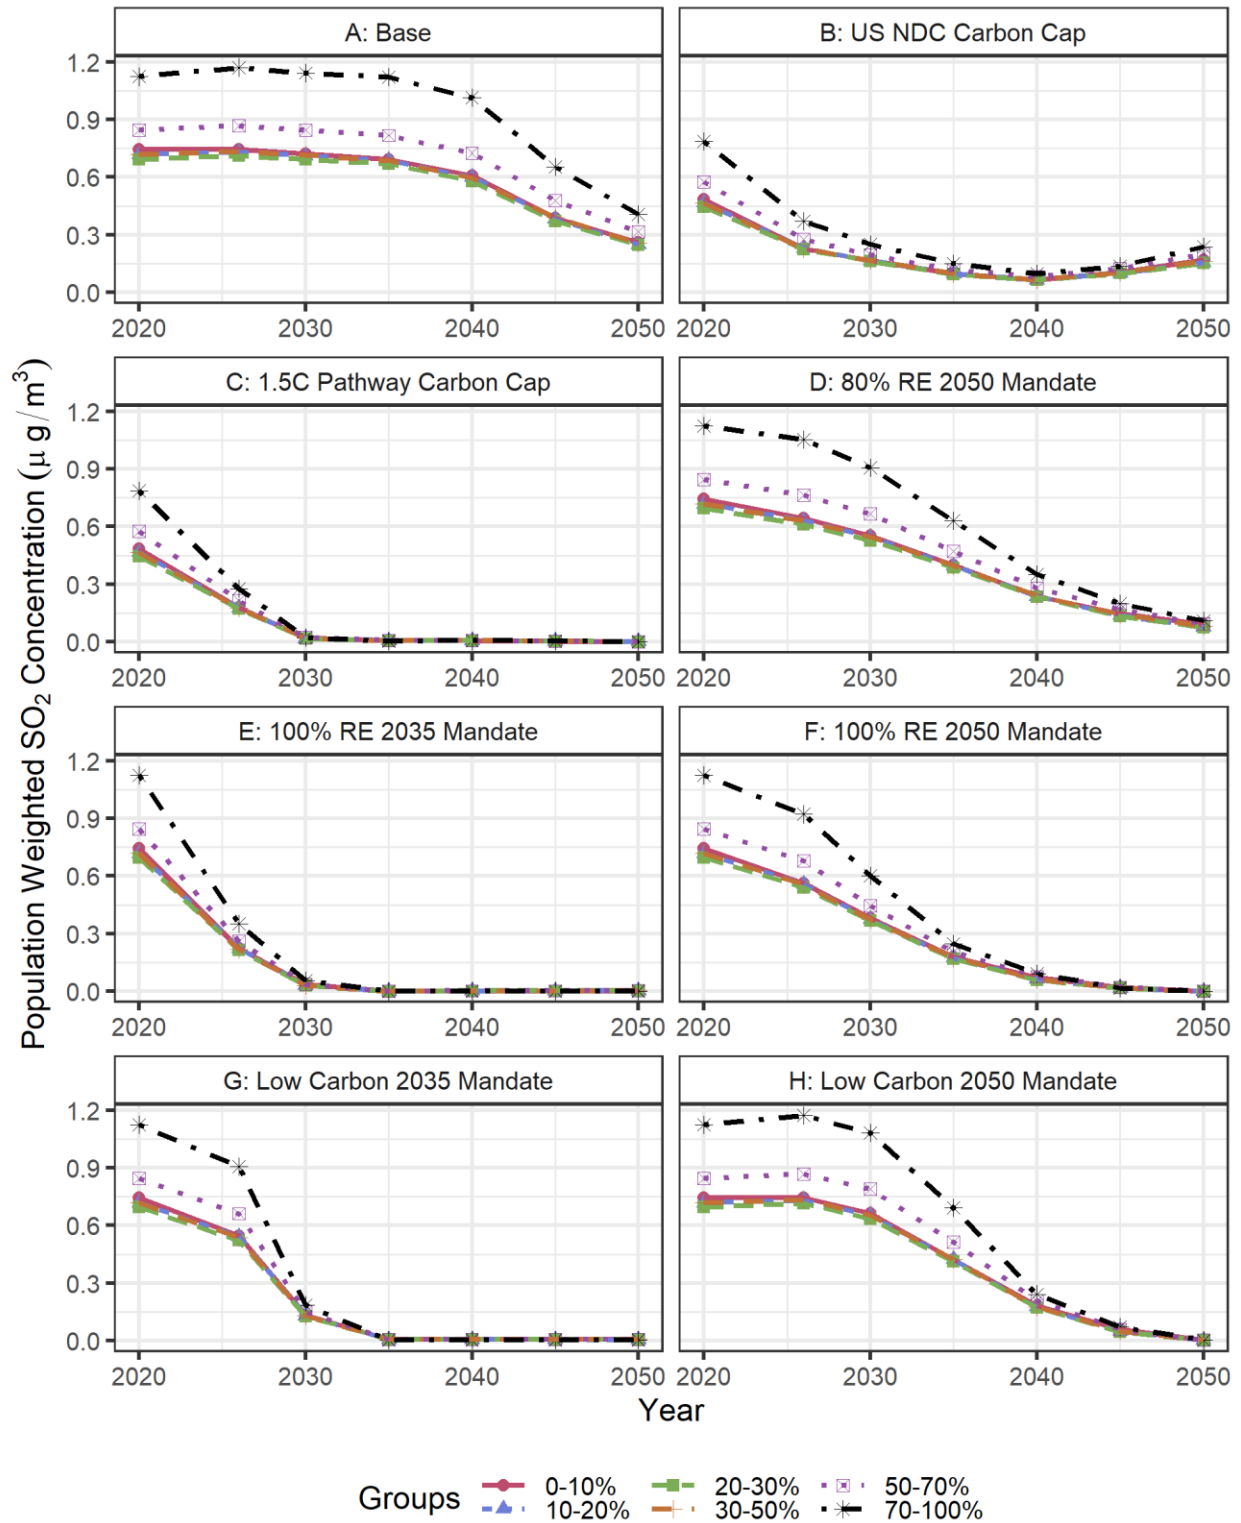

**Figure S-19:** Population weighted SO<sub>2</sub> concentration across poverty rate groups. We see that areas with high poverty rates reside in areas with high SO<sub>2</sub> concentrations across all decarbonization scenarios and time periods.



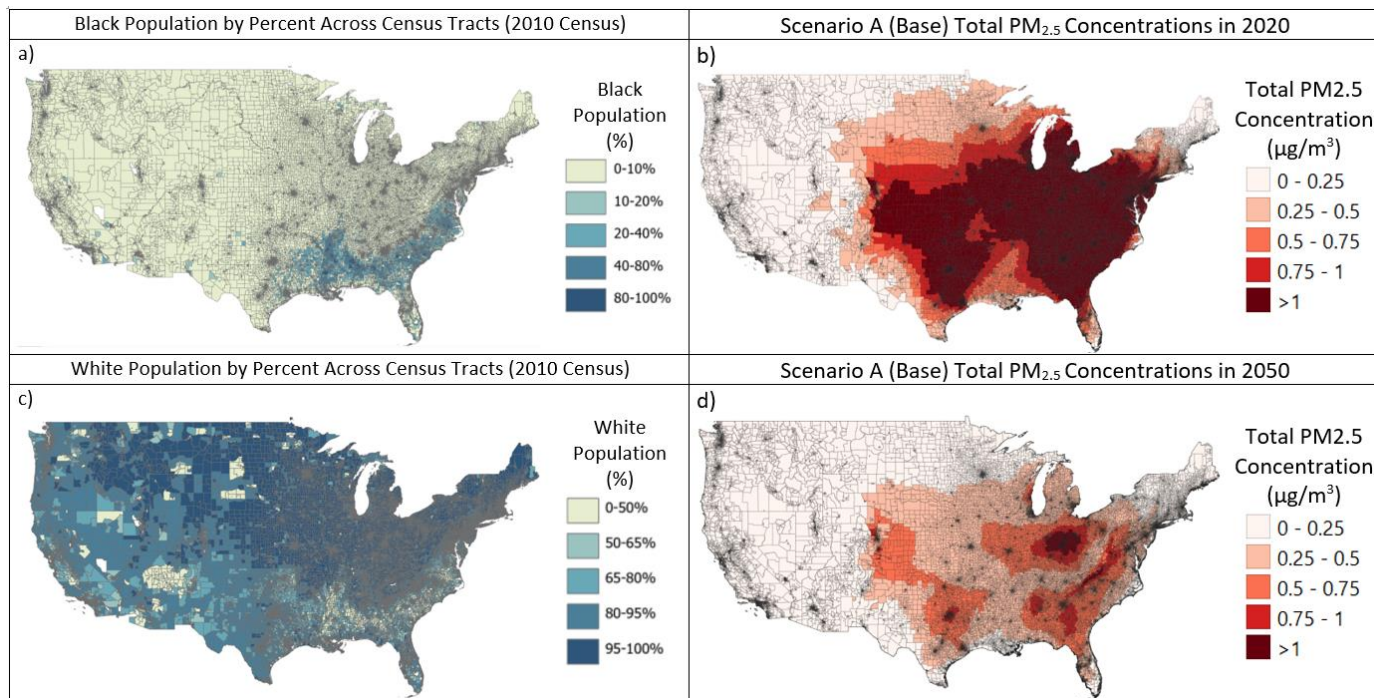

**Figure S-20:** Regional distribution of air pollution and racial/ethnic groups. The distribution of racial groups includes the (a) Black and (c) non-Latinx white communities by census tract. The distribution of air pollution in the Base Case (Scenario A) are shown for the years (b) 2020 and (d) 2050. We show the Black and white racial groups because these communities are exposed to the highest concentrations of PM<sub>2.5</sub> from the electricity sector across the entire modeling horizon in our analysis.

## References

1. Cohen, S. *et al.* *Regional Energy Deployment System (ReEDS) Model Documentation: Version 2018*. <https://www.nrel.gov/docs/fy19osti/72023.pdf>. (2019).
2. US EPA. *Estimating Particulate Matter Emissions for eGRID*. (2020).
3. Tessum, C. W., Hill, J. D. & Marshall, J. D. InMAP: A model for air pollution interventions. *PLoS One* **12**, e0176131 (2017).
4. Prener, C. Areal Weighted Interpolation. <https://cran.r-project.org/web/packages/areal/vignettes/areal-weighted-interpolation.html>.
